# Supplementary material for: Modular synthesis of 3-substituted isocoumarins via silver-catalyzed aerobic oxidation/6-endo heterocyclization of ortho-alkynylbenzaldehydes
Source: Royal Society of Chemistry journal article supplement (doi:10.1039/d1ob01065d), 2021-01-01
Supplement: d1ob01065d1.pdf [file d1ob01065d1.pdf]

*Supplementary Information*

Modular Synthesis of 3-Substituted  
Isocoumarins *via* Silver-Catalyzed Aerobic  
Oxidation/*6-Endo* Heterocyclization of *ortho*-  
Alkynylbenzaldehydes

Hao Wu,<sup>a</sup> Andrey Shatskiy,<sup>b</sup> Yi-Chun Wang,<sup>a</sup> Qiu-Yan Li,<sup>a</sup> Jian-Quan Liu,<sup>a,b,\*</sup> Markus D.  
Kärkäs,<sup>b,\*</sup> Xiang-Shan Wang<sup>a,\*</sup>

<sup>a</sup> School of Chemistry and Materials Science, Jiangsu Key Laboratory of Green Synthesis for  
Functional Materials Jiangsu Normal University, Xuzhou, Jiangsu 221116, China

<sup>b</sup> Department of Chemistry, KTH Royal Institute of Technology, SE-100 44 Stockholm,  
Sweden

\* E-mail: liujq316@jsnu.edu.cn; karkas@kth.se; xswang1974@yahoo.com

## Table of Contents

|                                                                                |           |
|--------------------------------------------------------------------------------|-----------|
| <b>I. Crystallography</b> .....                                                | <b>S1</b> |
| <b>II. NMR and HRMS spectra copies of 2 and 3</b> .....                        | <b>S2</b> |
| 3-Phenyl-1 <i>H</i> -isochromen-1-one (2a) .....                               | S2        |
| 7-Methyl-3-phenyl-1 <i>H</i> -isochromen-1-one (2c).....                       | S6        |
| 7-Methoxy-3-phenyl-1 <i>H</i> -isochromen-1-one (2d) .....                     | S8        |
| 3-Phenyl-6-(trifluoromethyl)-1 <i>H</i> -isochromen-1-one (2e).....            | S10       |
| 6-Chloro-3-phenyl-1 <i>H</i> -isochromen-1-one (2f).....                       | S12       |
| 6-Methyl-3-phenyl-1 <i>H</i> -isochromen-1-one (2g) .....                      | S14       |
| 6,7-Dimethoxy-3-phenyl-1 <i>H</i> -isochromen-1-one (2h) .....                 | S16       |
| 5-Fluoro-3-phenyl-1 <i>H</i> -isochromen-1-one (2i) .....                      | S18       |
| 3-(4-Chlorophenyl)-1 <i>H</i> -isochromen-1-one (2j).....                      | S20       |
| 3-( <i>p</i> -Tolyl)-1 <i>H</i> -isochromen-1-one (2k) .....                   | S22       |
| 3-(4-Ethylphenyl)-1 <i>H</i> -isochromen-1-one (2l).....                       | S24       |
| 3-(4-Ethoxyphenyl)-1 <i>H</i> -isochromen-1-one (2m) .....                     | S26       |
| 3-(4-Pentylphenyl)-1 <i>H</i> -isochromen-1-one (2n) .....                     | S28       |
| 3-(3-Methoxyphenyl)-1 <i>H</i> -isochromen-1-one (2o) .....                    | S30       |
| 3-(2-Fluorophenyl)-1 <i>H</i> -isochromen-1-one (2p) .....                     | S32       |
| 3-Methyl-1 <i>H</i> -isochromen-1-one (2q).....                                | S34       |
| 3-Pentyl-1 <i>H</i> -isochromen-1-one (2r).....                                | S36       |
| 3-(Cyclohex-1-en-1-yl)-1 <i>H</i> -isochromen-1-one (2s) .....                 | S38       |
| 3-(Thiophen-2-yl)-1 <i>H</i> -isochromen-1-one (2t) .....                      | S40       |
| 2-Phenyl-4 <i>H</i> -benzo[ <i>f</i> ]isochromen-4-one (2u).....               | S42       |
| 5-Phenyl-7 <i>H</i> -thieno[2,3- <i>c</i> ]pyran-7-one (3a) .....              | S44       |
| 5-( <i>p</i> -tolyl)-7 <i>H</i> -thieno[2,3- <i>c</i> ]pyran-7-one (3b) .....  | S46       |
| 5-(4-Methoxyphenyl)-7 <i>H</i> -thieno[2,3- <i>c</i> ]pyran-7-one (3c) .....   | S48       |
| 5-(3-Methoxyphenyl)-7 <i>H</i> -thieno[2,3- <i>c</i> ]pyran-7-one (3d) .....   | S50       |
| 5-(Cyclohex-1-en-1-yl)-7 <i>H</i> -thieno[2,3- <i>c</i> ]pyran-7-one (3e)..... | S52       |
| 7-Phenyl-5 <i>H</i> -pyrano[4,3- <i>b</i> ]pyridin-5-one (3f).....             | S54       |

|                                                                     |     |
|---------------------------------------------------------------------|-----|
| 7-Butyl-5 <i>H</i> -pyrano[4,3- <i>b</i> ]pyridin-5-one (3g).....   | S56 |
| 3-Phenyl-1 <i>H</i> -pyrano[4,3- <i>b</i> ]quinolin-1-one (3h)..... | S58 |

## I. Crystallography

Compound **2d** (58 mg) was dissolved in a centrifuge tube with 100  $\mu\text{L}$  DMF and 50  $\mu\text{L}$   $\text{H}_2\text{O}$ . Two days later, we can get the the single-crystal of **2d**. Single-crystal X-ray diffraction data for the reported complex was recorded at a temperature of 296(2) K on a Oxford Diffraction Gemini R Ultra diffractometer, using a  $\omega$  scan technique with Mo-K $\alpha$  radiation ( $\lambda = 0.71073$  Å). The structure was solved by Direct Method of SHELXS-97 and refined by full-matrix least-squares techniques using the SHELXL-97 program.<sup>1</sup> Non-hydrogen atoms were refined with anisotropic temperature parameters, and hydrogen atoms of the ligands were refined as rigid groups. Basic information pertaining to crystal parameters and structure refinement is summarized in Table S1.

- 1 (a) G. M. Sheldrick, *SHELXS-97, Program for Solution of Crystal Structures*, University of Gottingen, Germany, 1997; (b) G. M. Sheldrick, *SHELXL-97, Program for Refinement of Crystal Structures*, University of Gottingen, Germany, 1997.

**Table S1.** Crystal data of **2d** with 30% probability levels and structure refinement.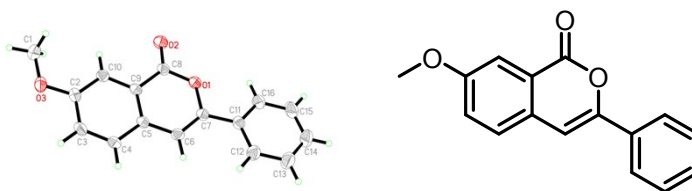

|                                   |                                                                                                                                      |
|-----------------------------------|--------------------------------------------------------------------------------------------------------------------------------------|
| Empirical formula                 | C <sub>16</sub> H <sub>12</sub> O <sub>3</sub>                                                                                       |
| Temperature                       | 296(2) K                                                                                                                             |
| Wavelength                        | 0.71073 Å                                                                                                                            |
| Unit cell dimensions              | a = 7.0451(17) Å<br>b = 7.3918(17) Å<br>c = 12.782(3) Å<br>alpha = 76.201(3) deg.<br>beta = 81.124(3) deg.<br>gamma = 73.395(3) deg. |
| Volume                            | 616.8(3) Å <sup>3</sup>                                                                                                              |
| Z                                 | 2                                                                                                                                    |
| Space group                       | P -1                                                                                                                                 |
| Calculated density                | 1.358 Mg/m <sup>3</sup>                                                                                                              |
| Absorption coefficient            | 0.094 mm <sup>-1</sup>                                                                                                               |
| F(000)                            | 264                                                                                                                                  |
| Crystal size                      | 0.32 x 0.28 x 0.24 mm                                                                                                                |
| Theta range for data collection   | 2.94 to 25.02 deg.                                                                                                                   |
| Reflections collected / unique    | 6292 / 2159 [R(int) = 0.0195]                                                                                                        |
| Data / restraints / parameters    | 2159 / 0 / 173                                                                                                                       |
| Goodness-of-fit on F <sup>2</sup> | 1.082                                                                                                                                |
| Final R indices [I > 2sigma(I)]   | R1 = 0.0454, wR2 = 0.1218                                                                                                            |
| R indices (all data)              | R1 = 0.0507, wR2 = 0.1317                                                                                                            |

## II. NMR and HRMS spectra copies of 2 and 3

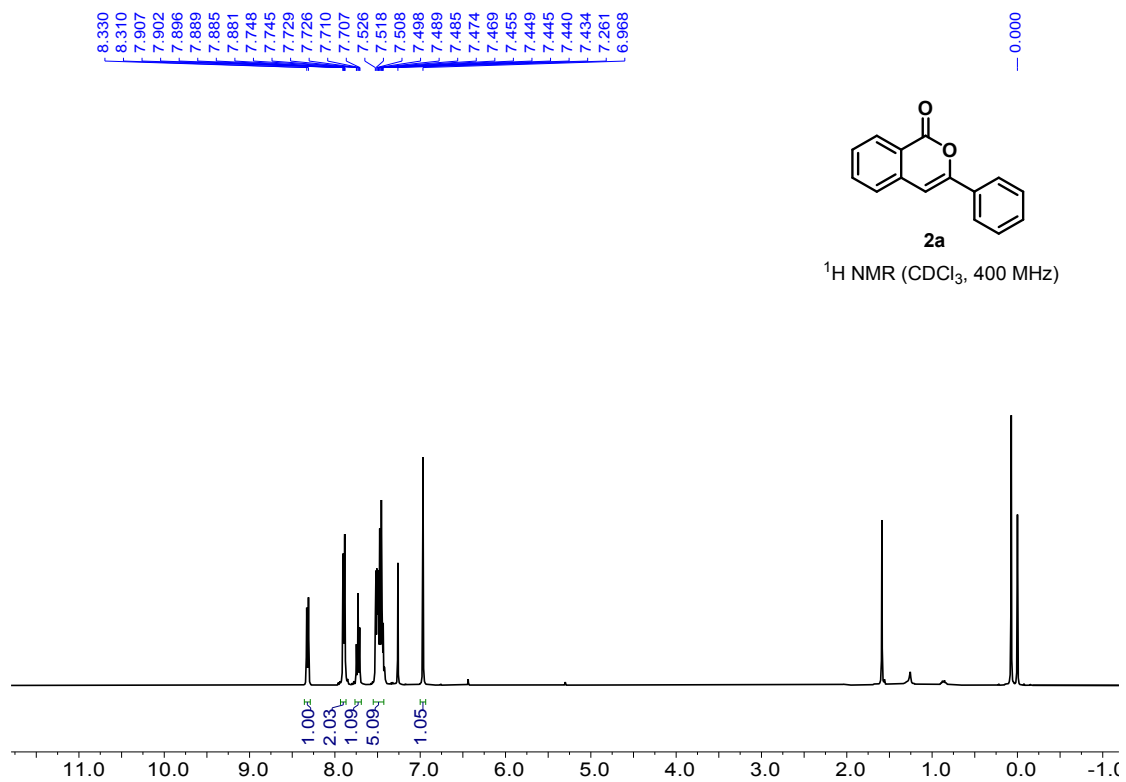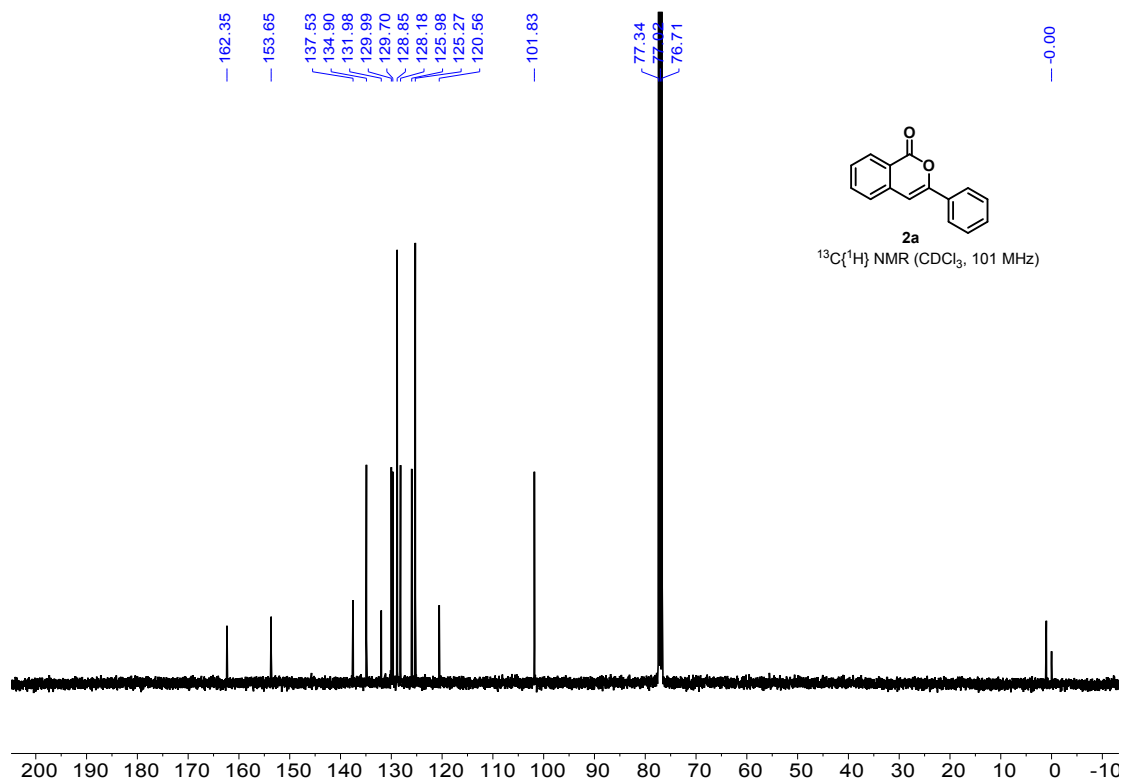

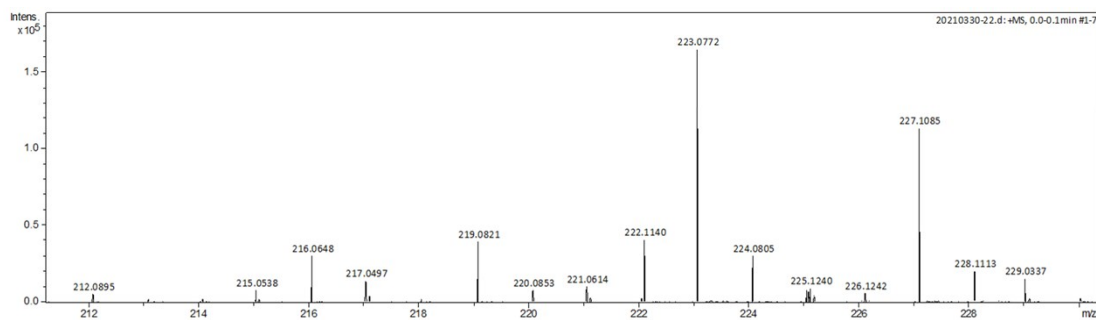

(2a) HRMS (ESI-TOF)  $m/z$  calcd for  $C_{15}H_{11}O_2 [M + H]^+$ : 223.0754, found 223.0772.

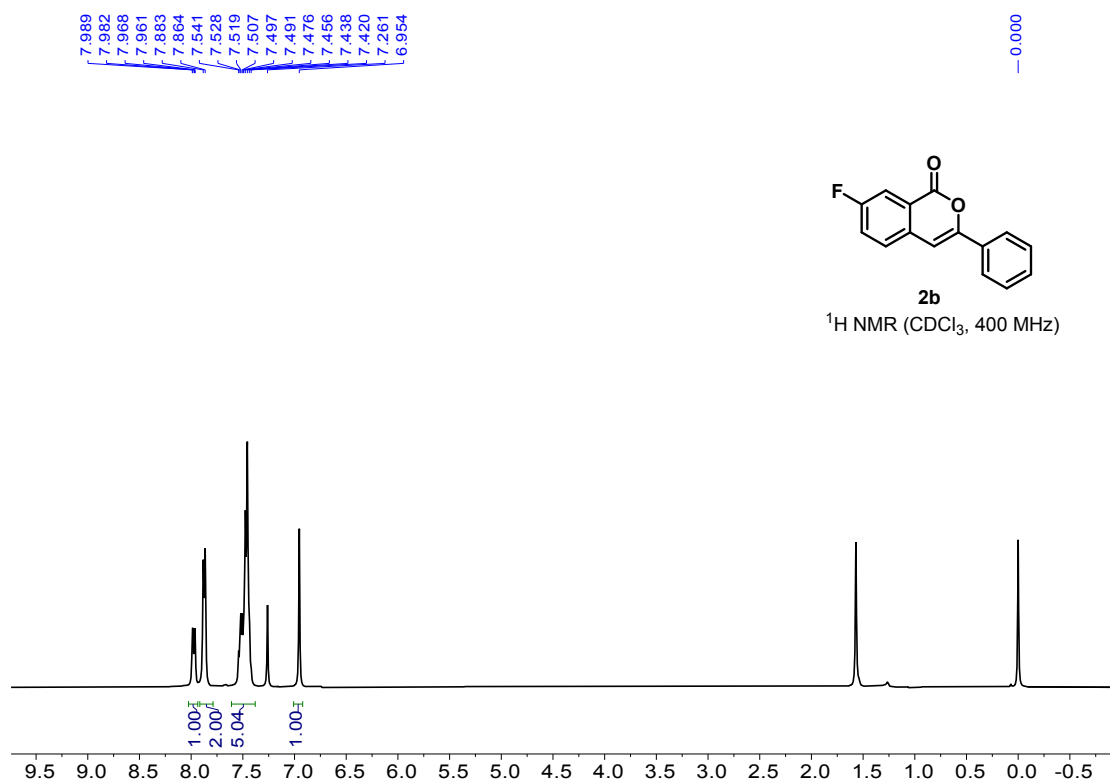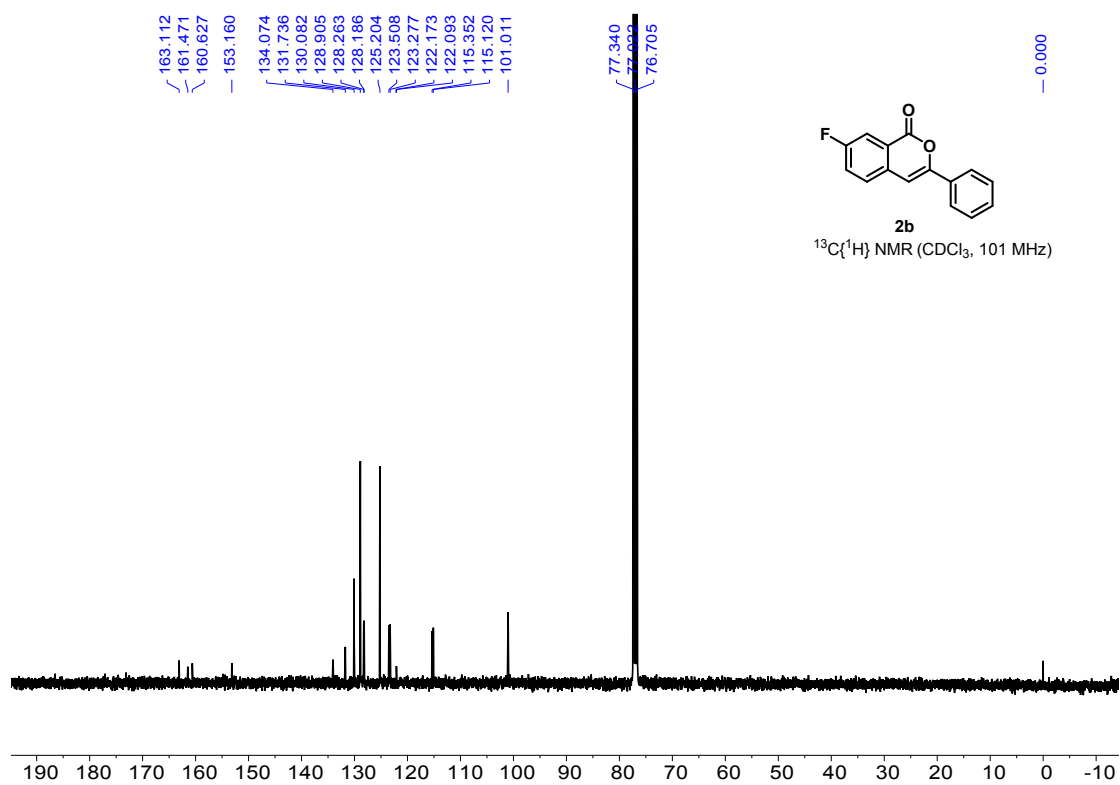



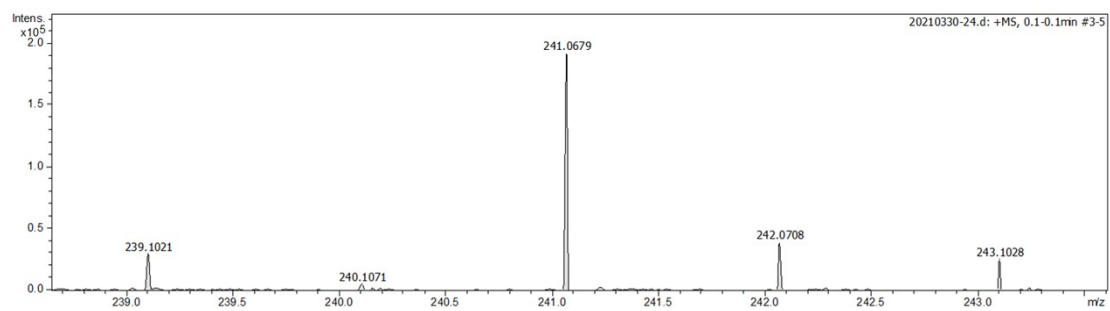

**(2b) HRMS (ESI-TOF)  $m/z$  calcd for  $C_{15}H_{10}FO_2$   $[M + H]^+$ : 241.0659, found 241.0679.**

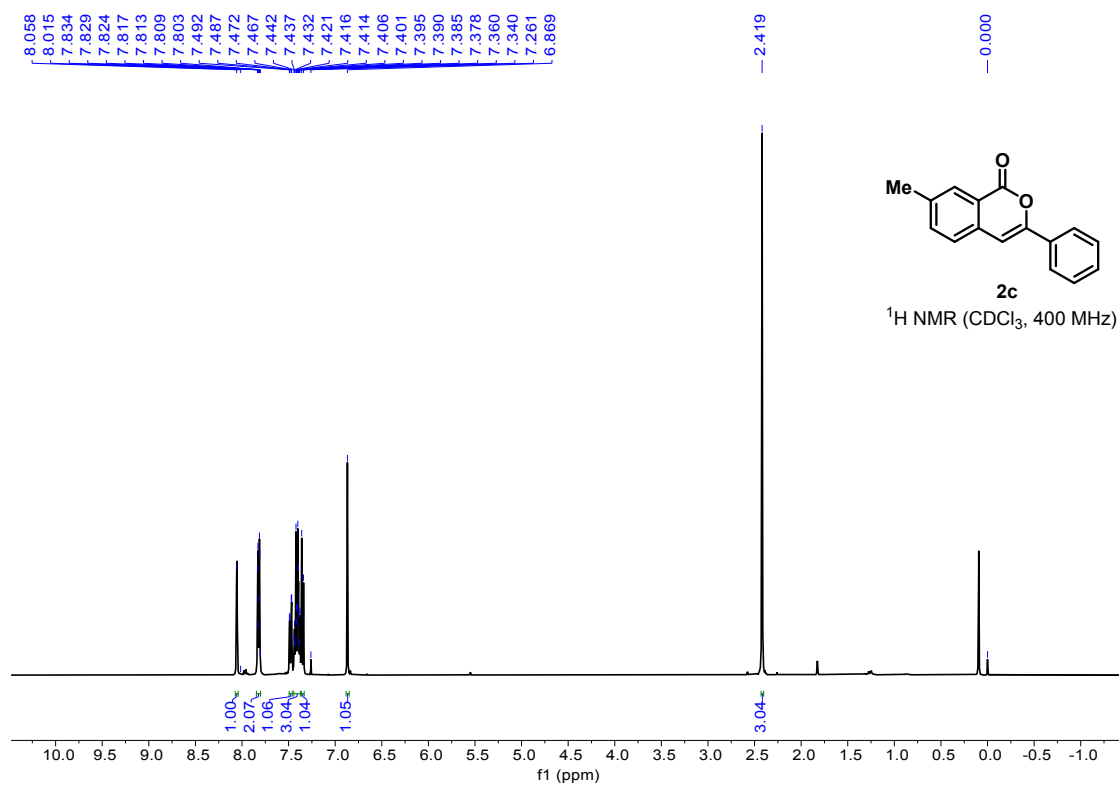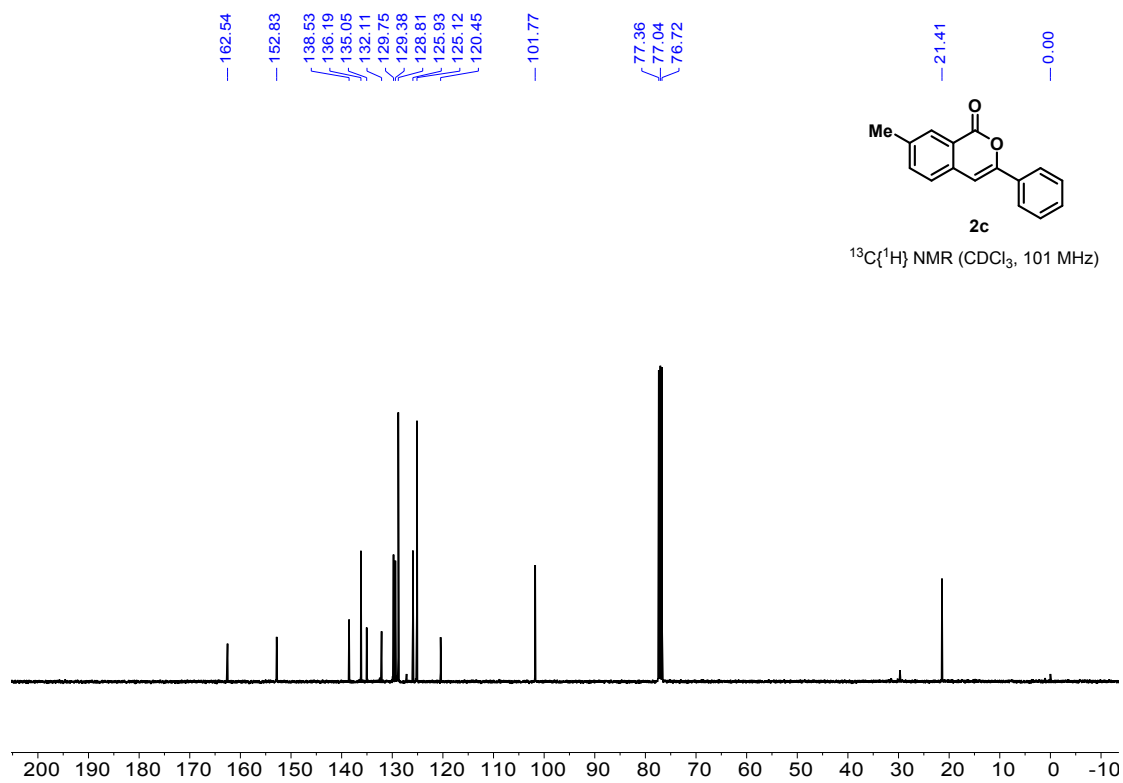

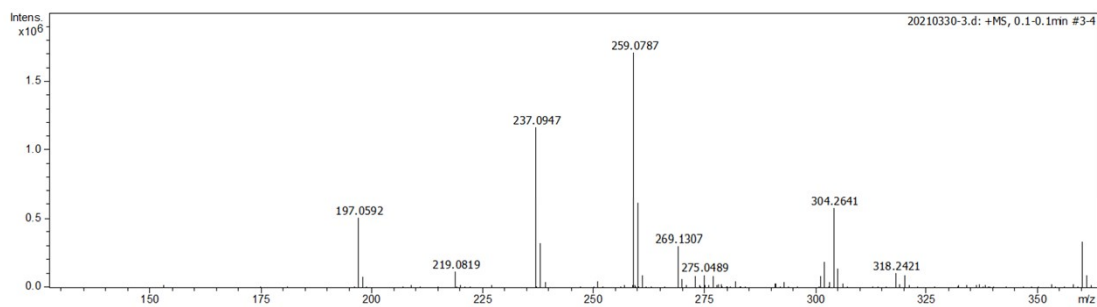

(2c) HRMS (ESI-TOF)  $m/z$  calcd for  $C_{16}H_{13}O_2 [M + H]^+$ : 237.0910, found 237.0947.

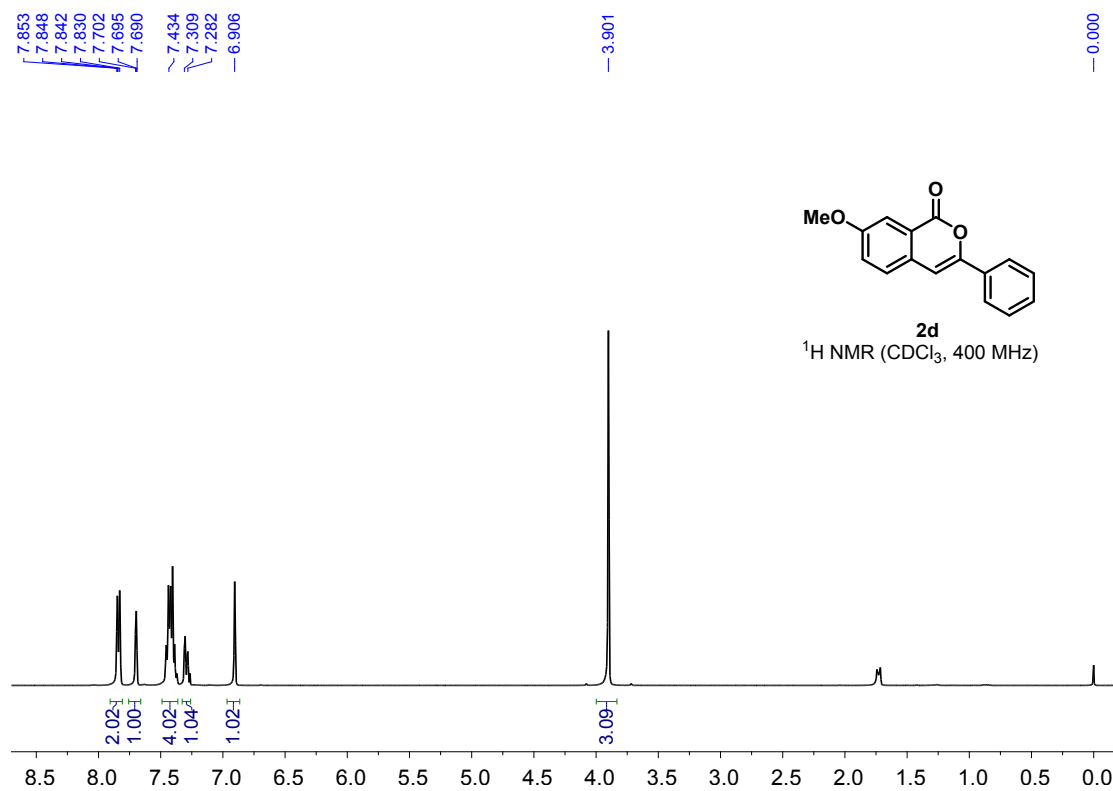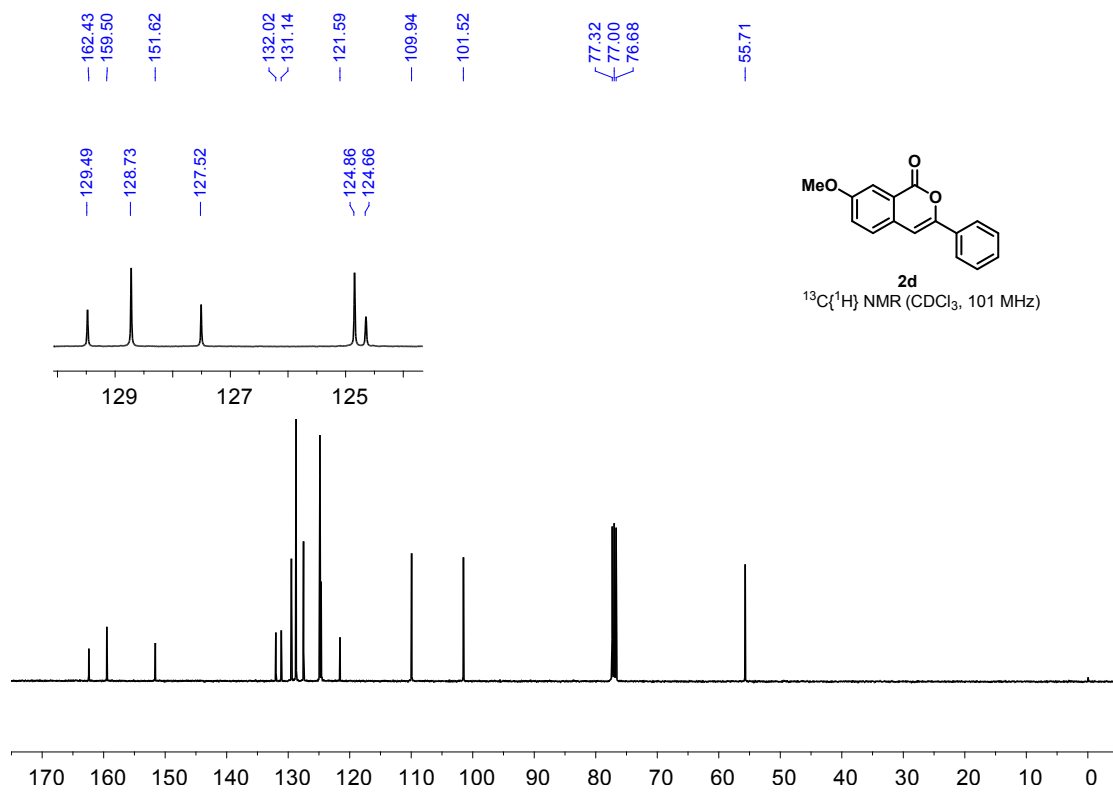

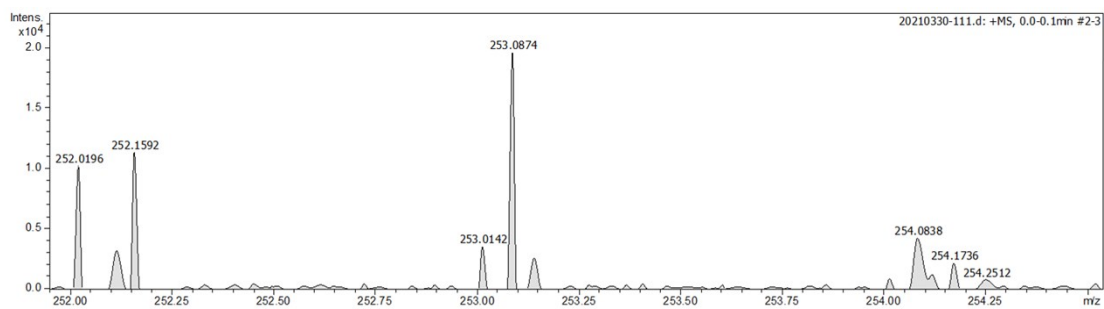

(2d) HRMS (ESI-TOF)  $m/z$  calcd for  $C_{16}H_{13}O_3 [M + H]^+$ : 253.0859, found 253.0874.

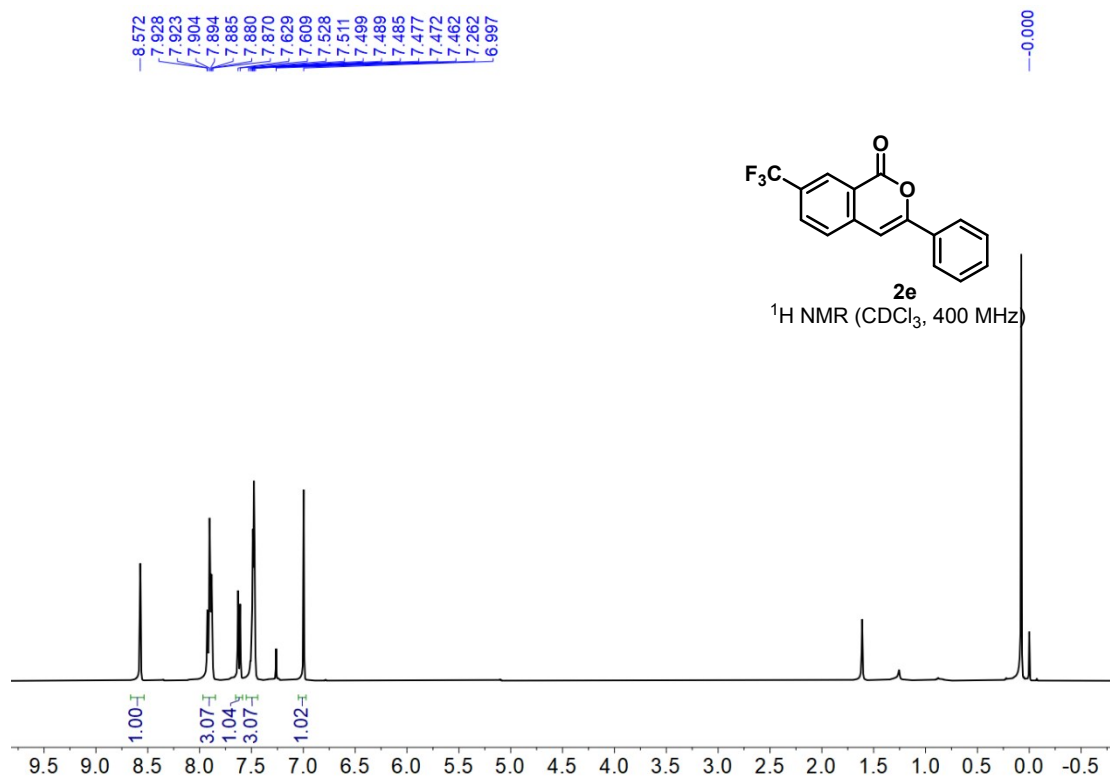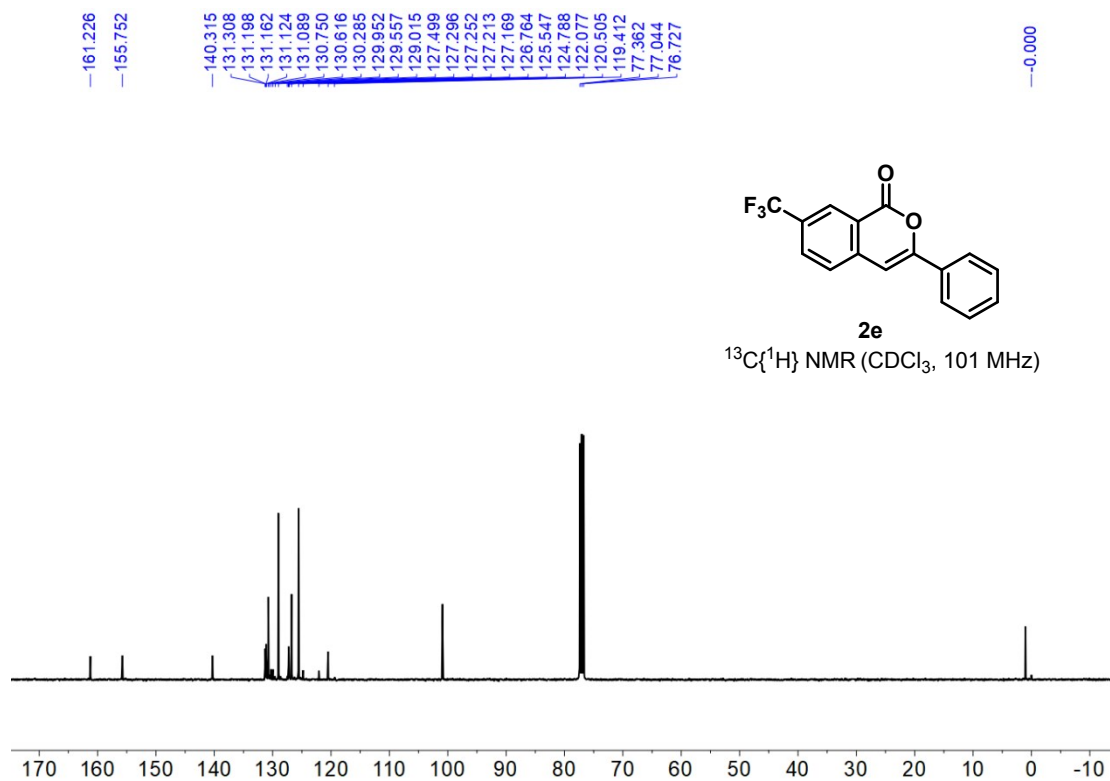

20210415\_001 #2181 RT: 8.07 AV: 1 SB: 2 3.00, 3.00 NL: 4.67E8  
T: FTMS + p EI Full ms [50.0000-750.0000]

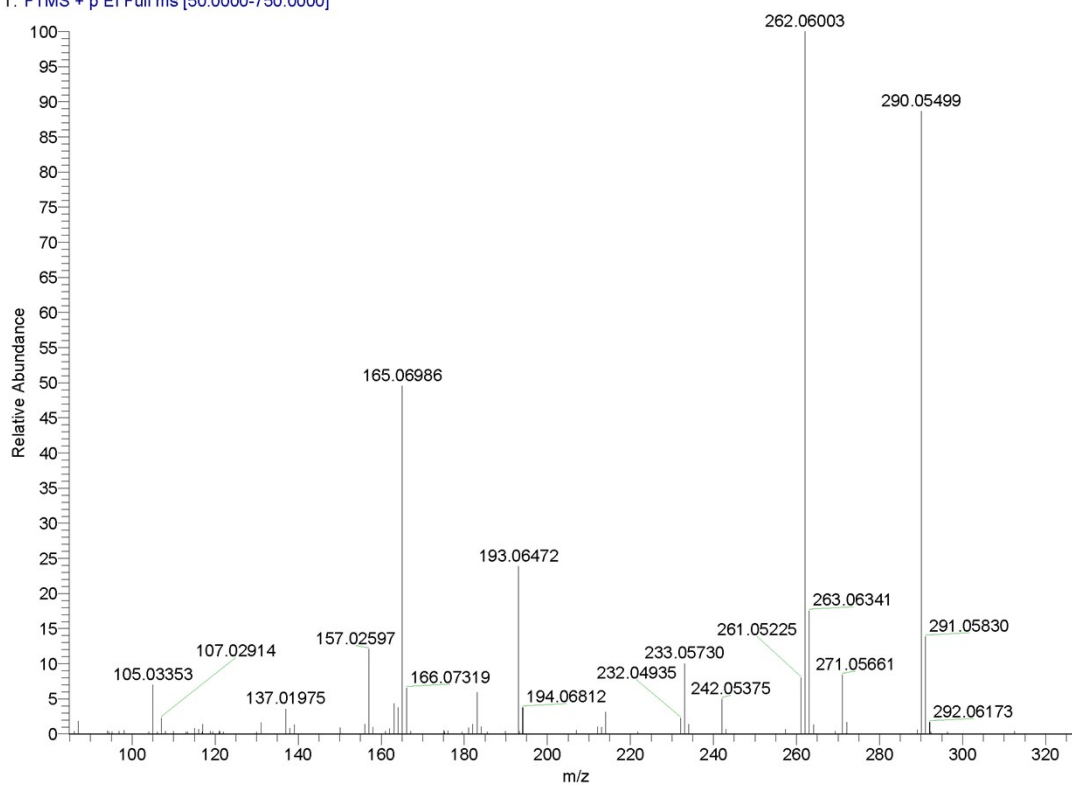

(2e) HRMS (EI)  $m/z$  calcd for  $C_{16}H_9F_3O_2$   $[M]^+$ : 290.05546, found 290.05499.

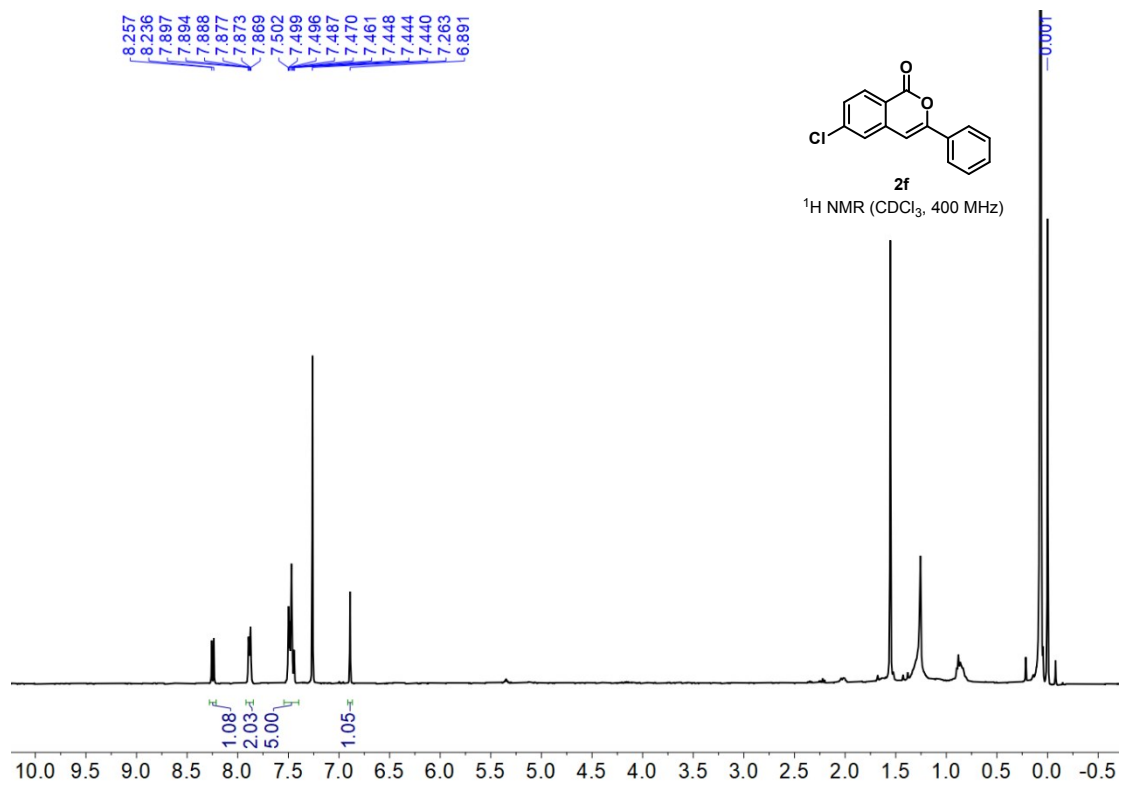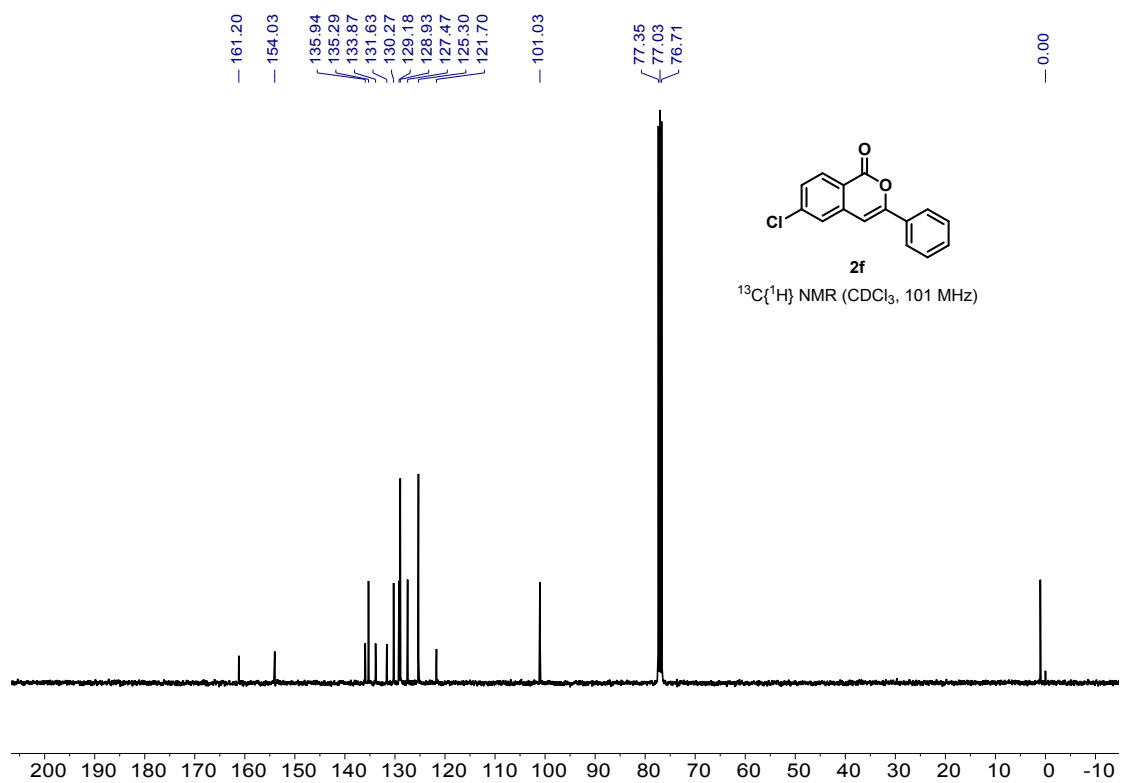



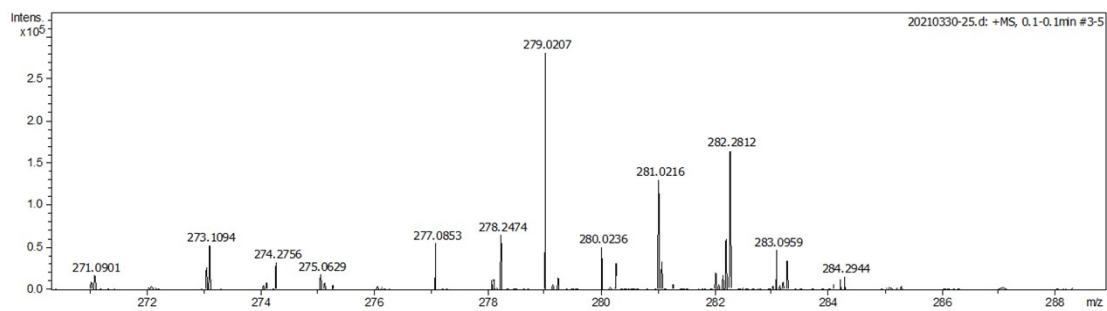

**(2f) HRMS (ESI-TOF)  $m/z$  calcd for  $C_{15}H_9ClNaO_2$   $[M + H]^+$ : 279.0183, found 279.0207.**

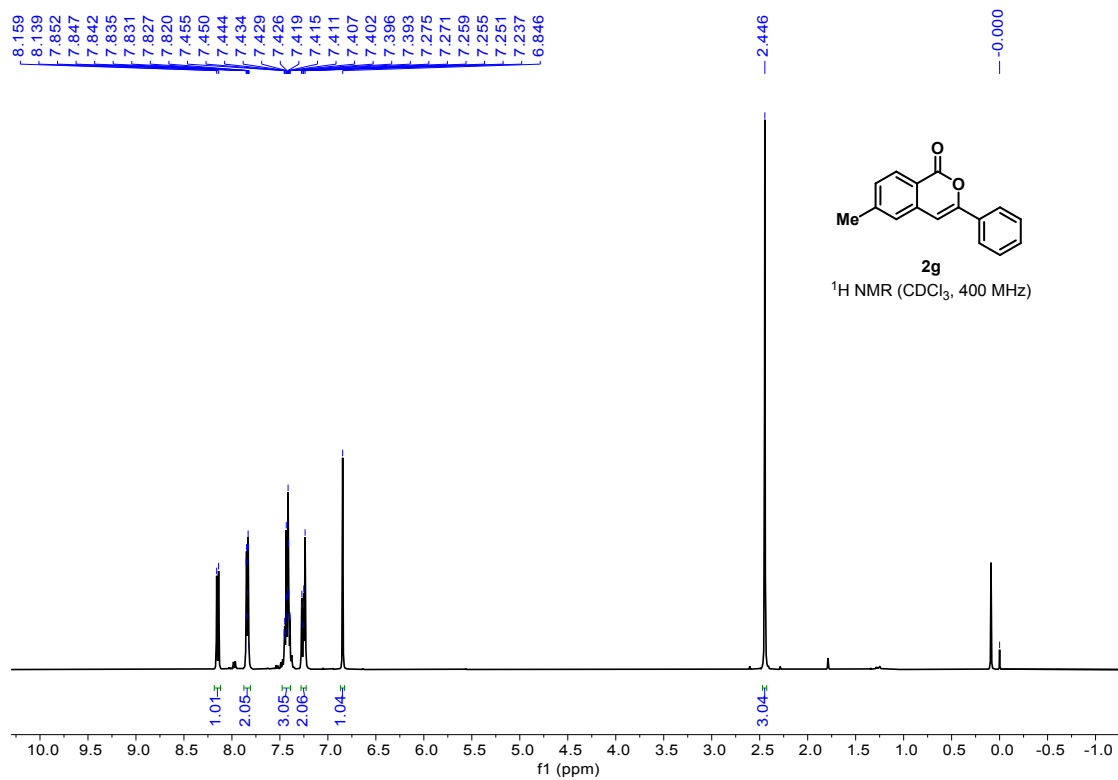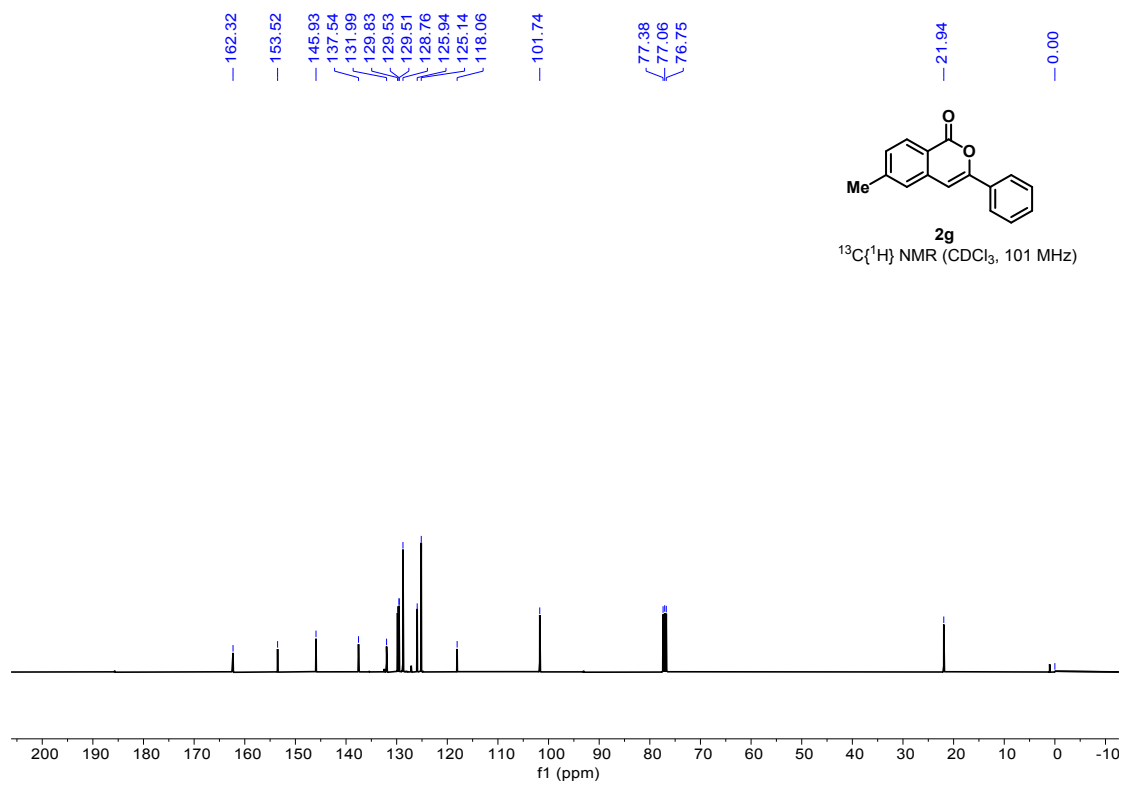

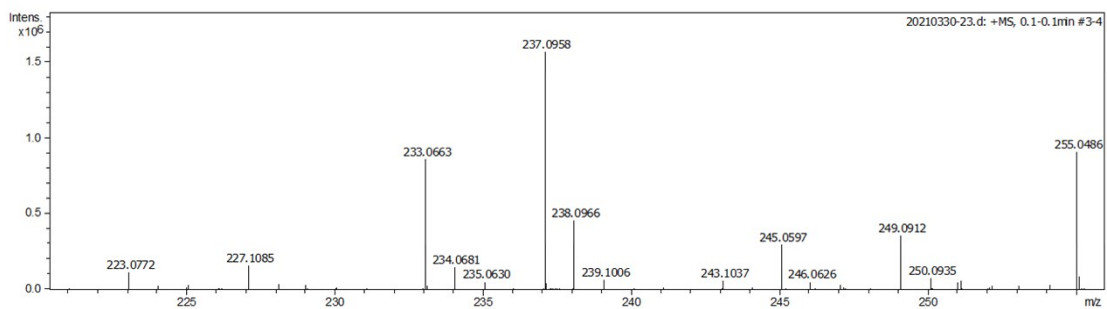

(2g) HRMS (ESI-TOF)  $m/z$  calcd for  $C_{16}H_{13}O_2$   $[M + H]^+$ : 237.0910, found 237.0958.

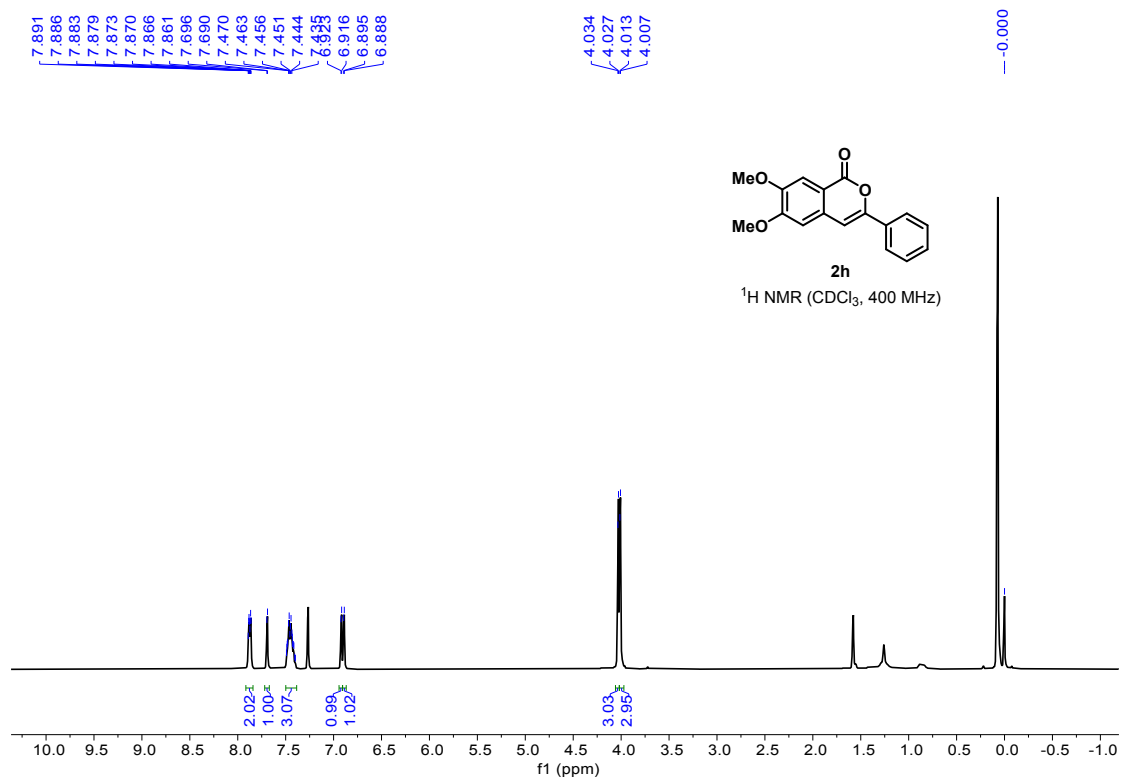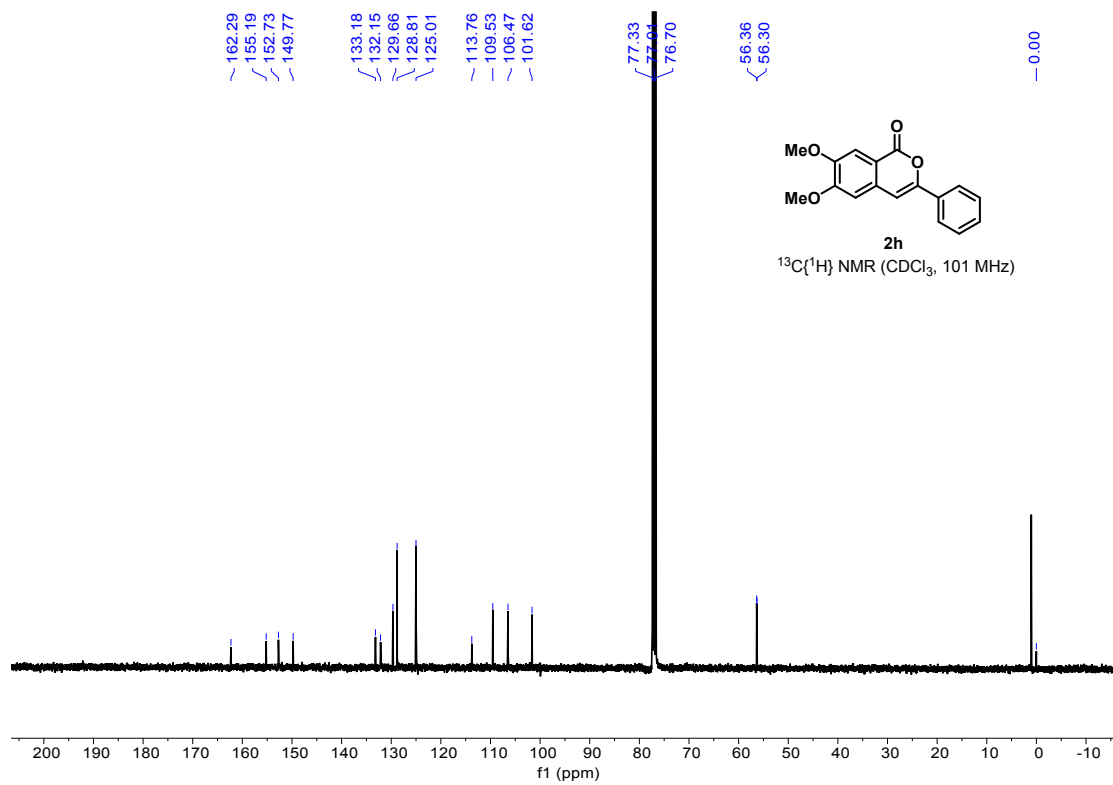

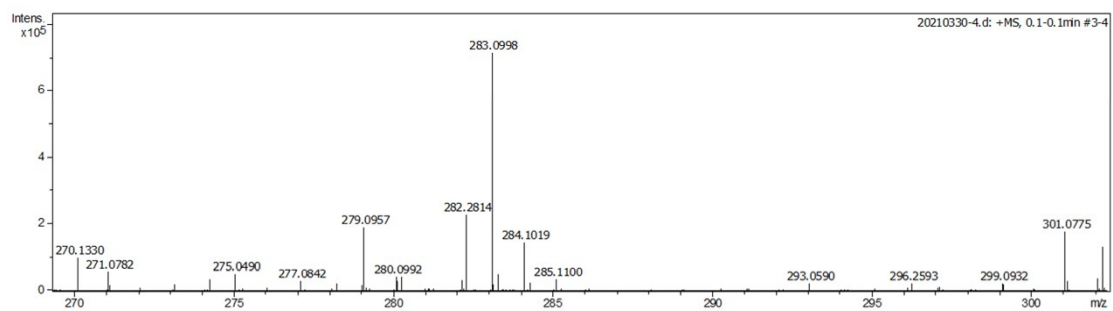

(2h) HRMS (ESI-TOF)  $m/z$  calcd for  $C_{17}H_{15}O_4$   $[M + H]^+$ : 283.0965, found 283.0998.

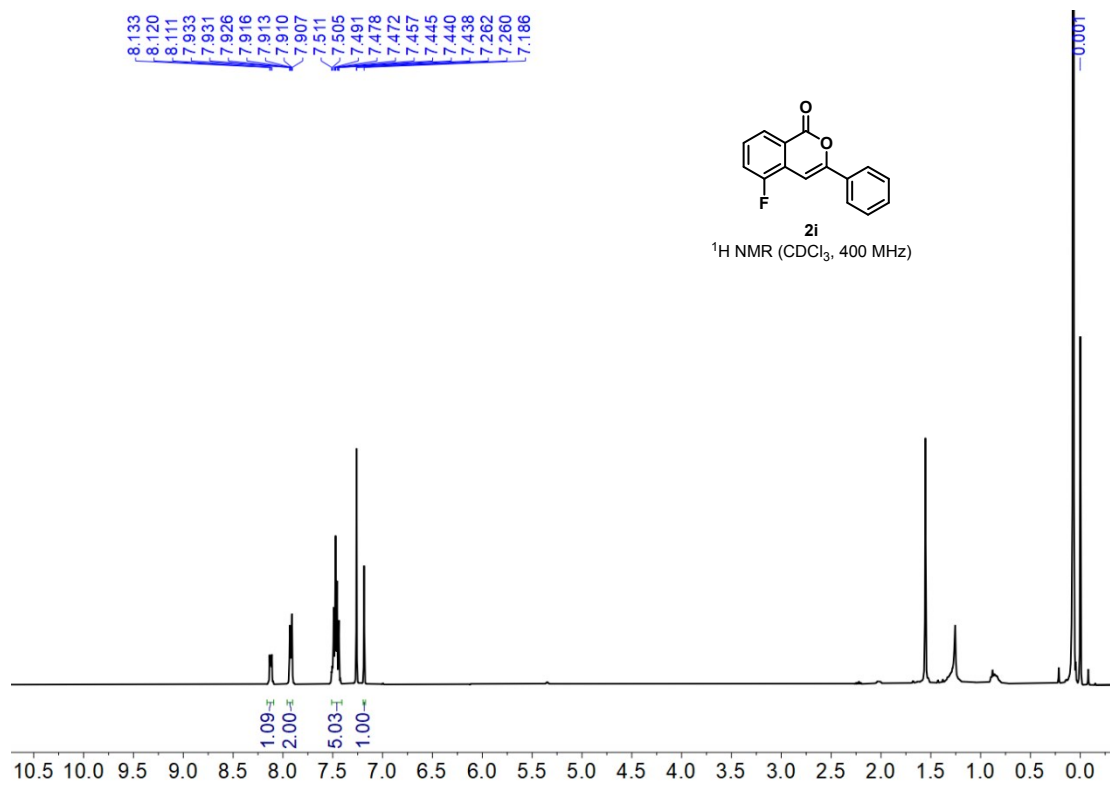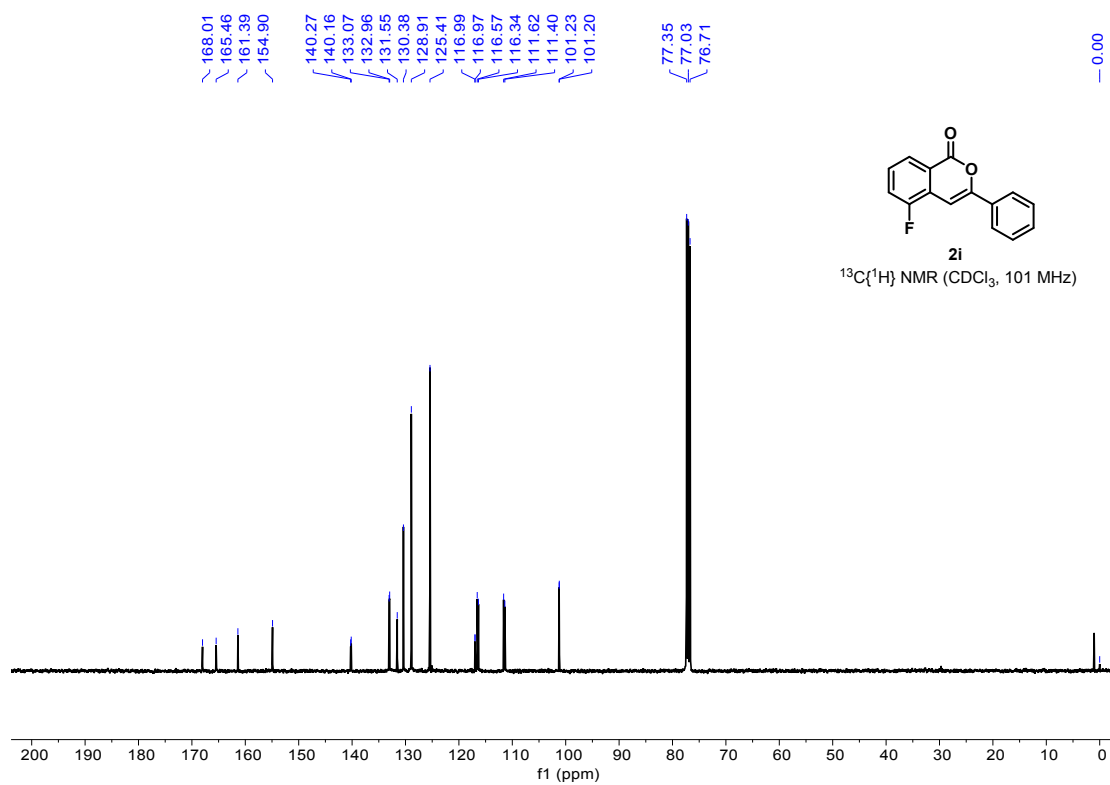

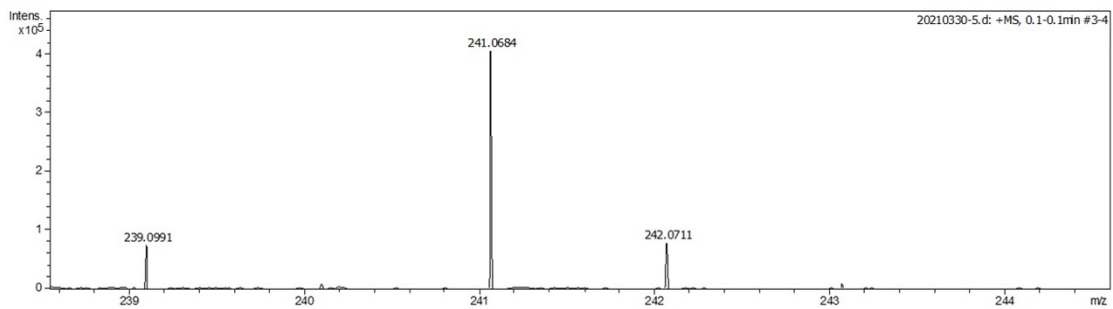

**(2i) HRMS (ESI-TOF)  $m/z$  calcd for  $C_{15}H_{10}FO_2$   $[M + H]^+$ : 241.0659, found 241.0684.**

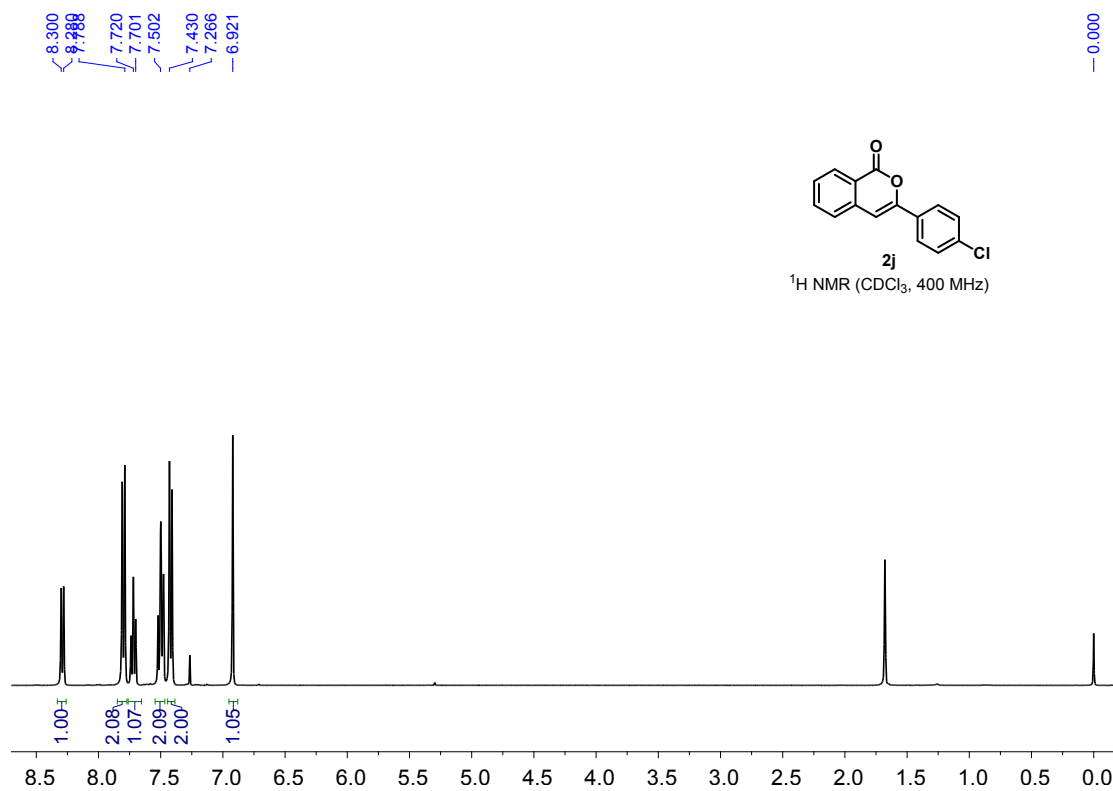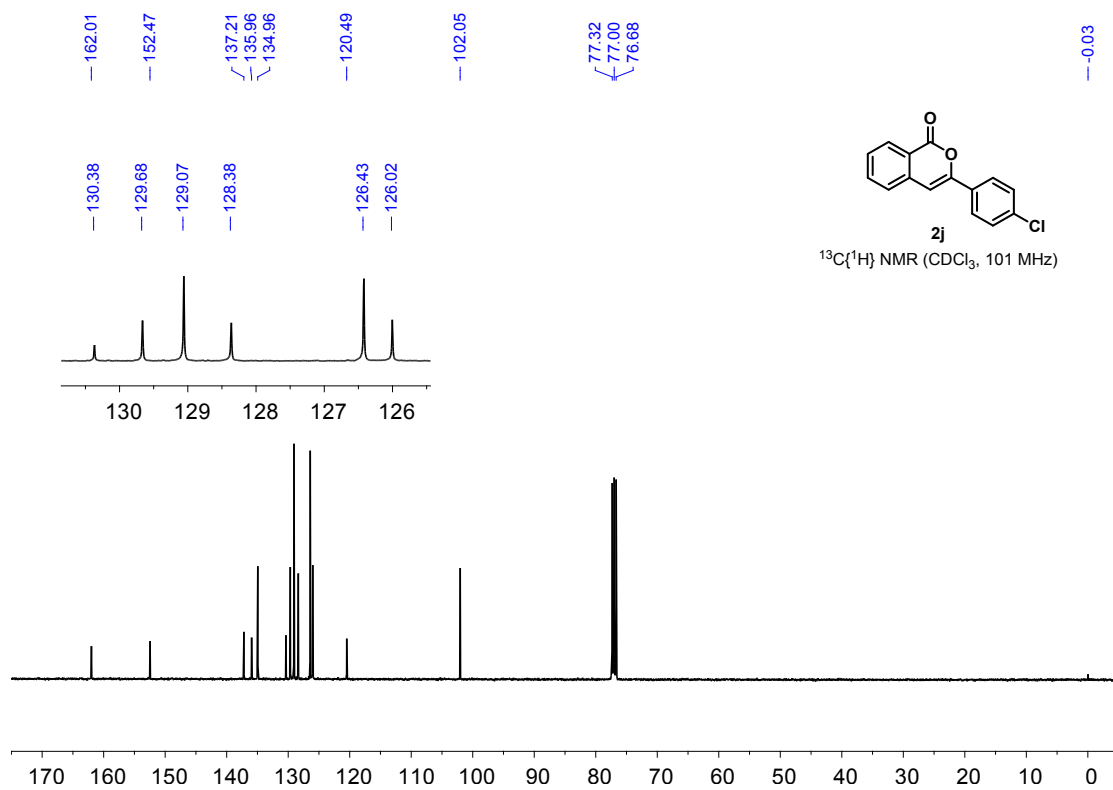



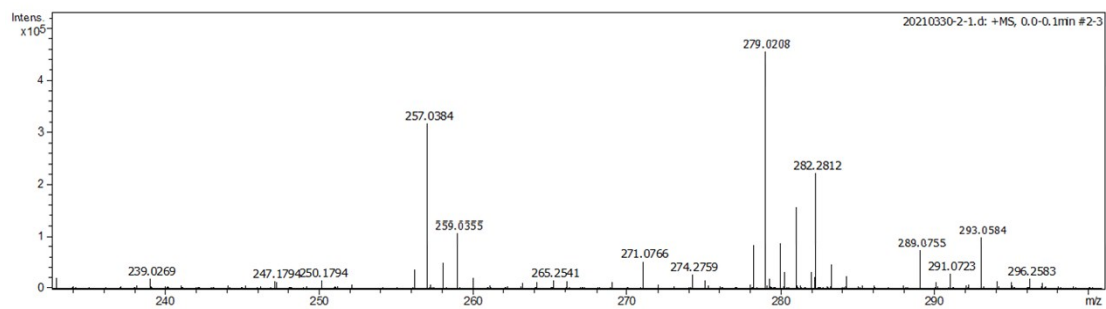

**(2j)** HRMS (ESI-TOF)  $m/z$  calcd for  $C_{15}H_{20}ClO_2$   $[M + H]^+$ : 257.0364, found 257.0384.

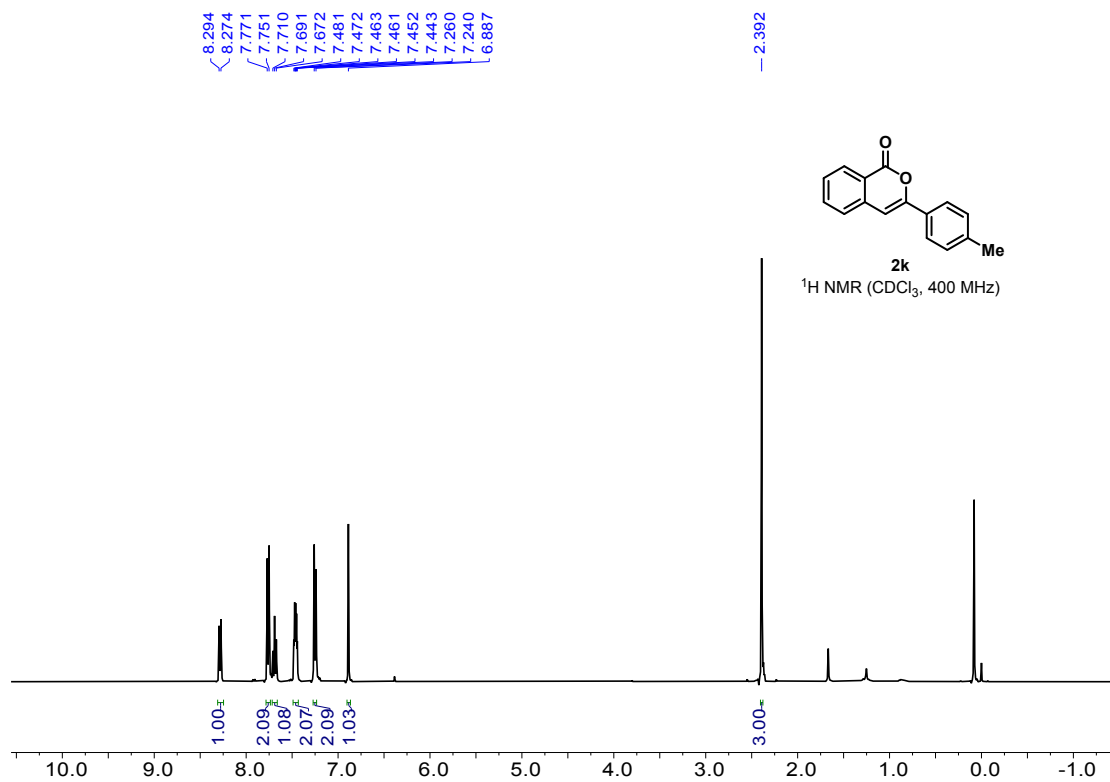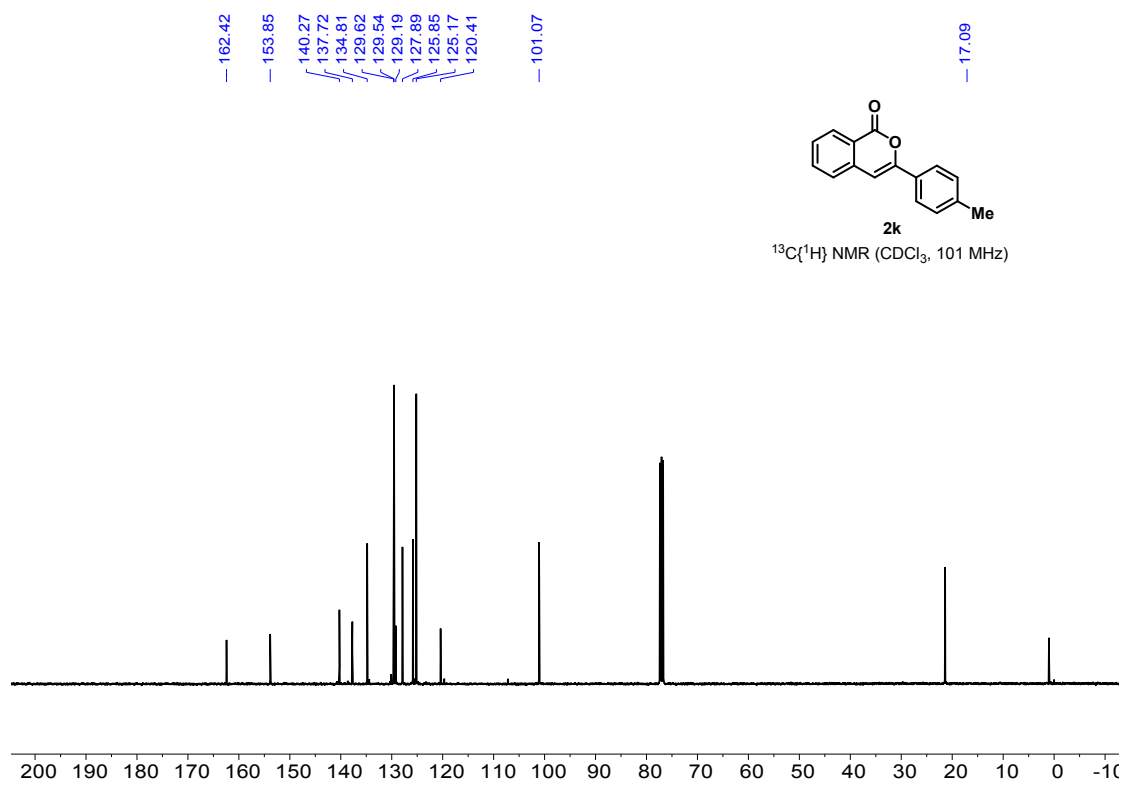

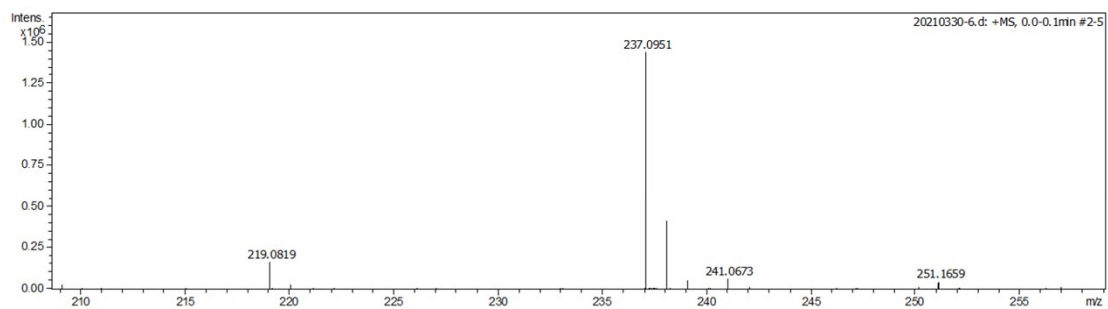

(**2k**) HRMS (ESI-TOF)  $m/z$  calcd for  $C_{16}H_{13}O_2$   $[M + H]^+$ : 237.0910, found 237.0951.

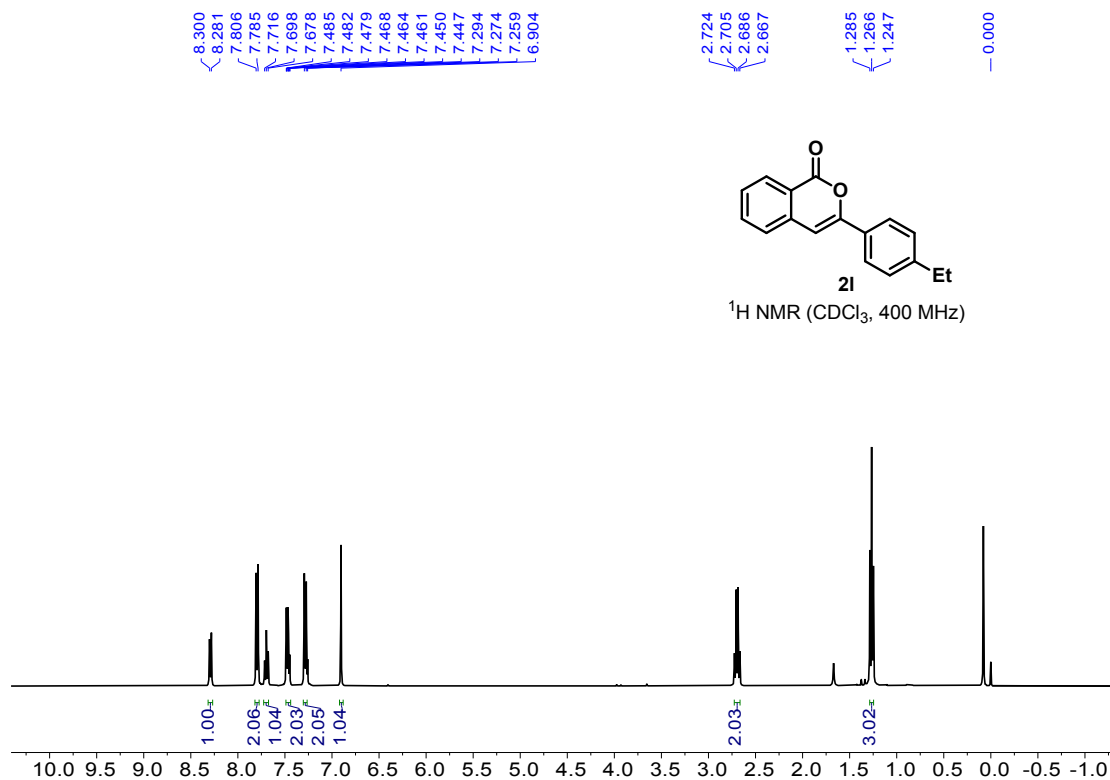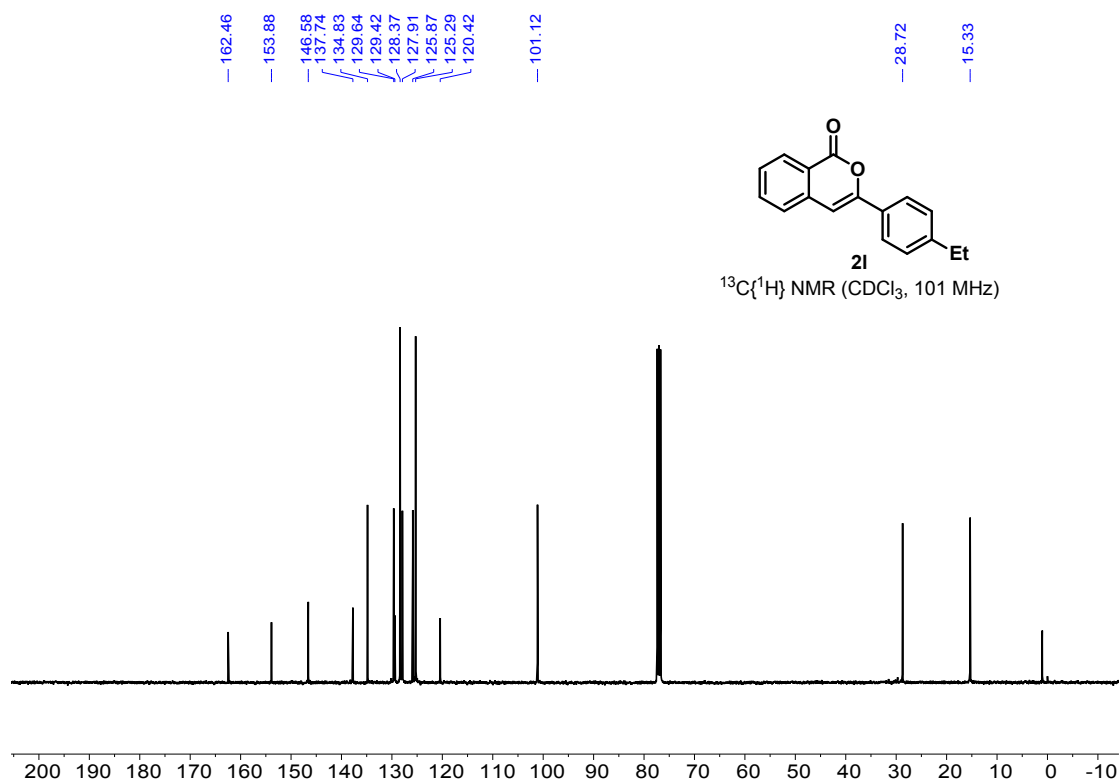

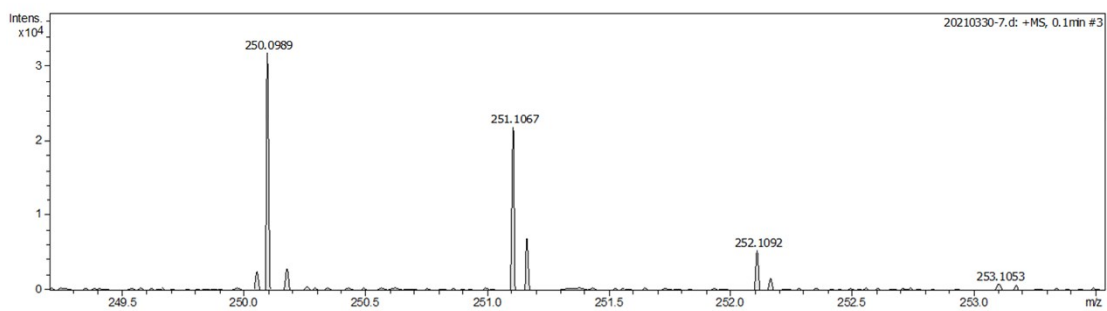

(21) HRMS (ESI-TOF)  $m/z$  calcd for  $C_{17}H_{15}O_3$   $[M + H]^+$ : 251.1067, found 251.1067.

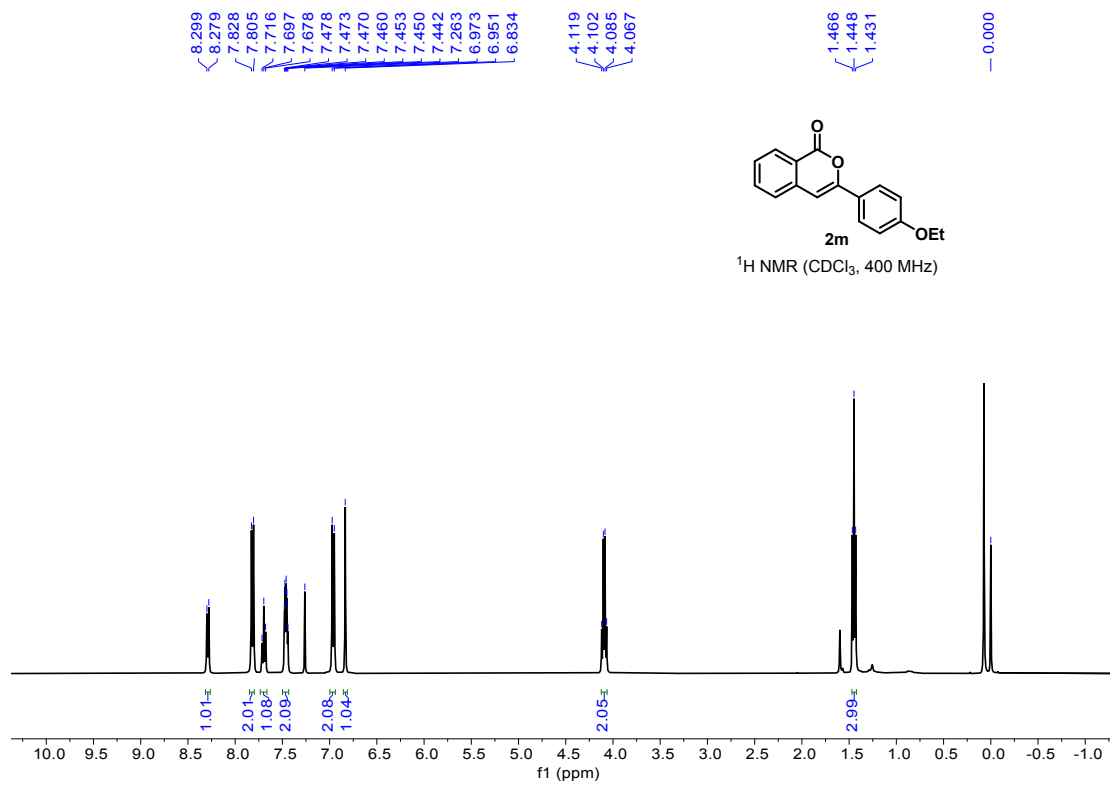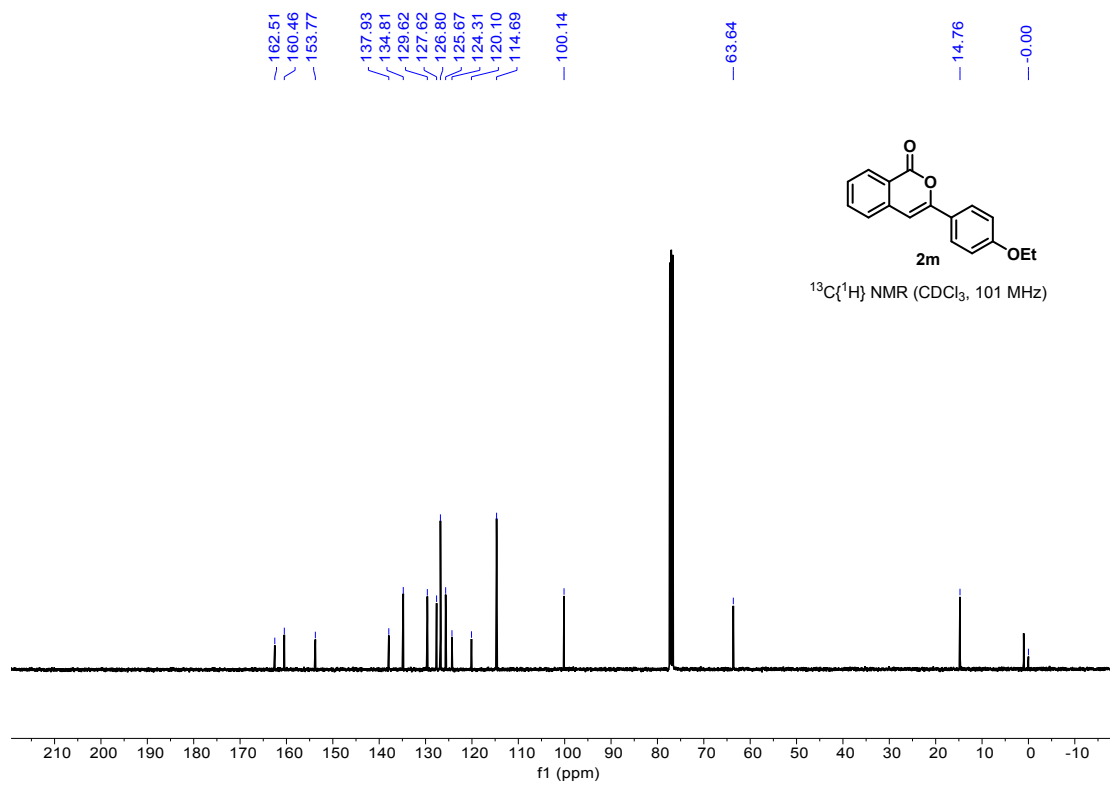

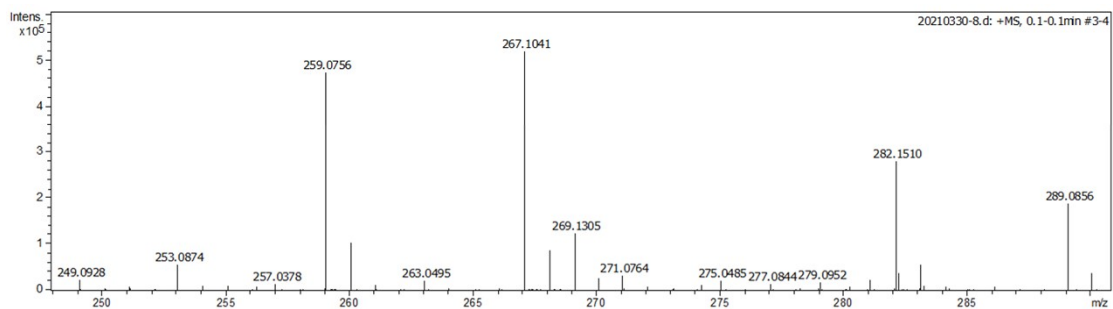

(2m) HRMS (ESI-TOF)  $m/z$  calcd for  $C_{17}H_{15}O_3$   $[M + H]^+$ : 267.1016, found 267.1041.

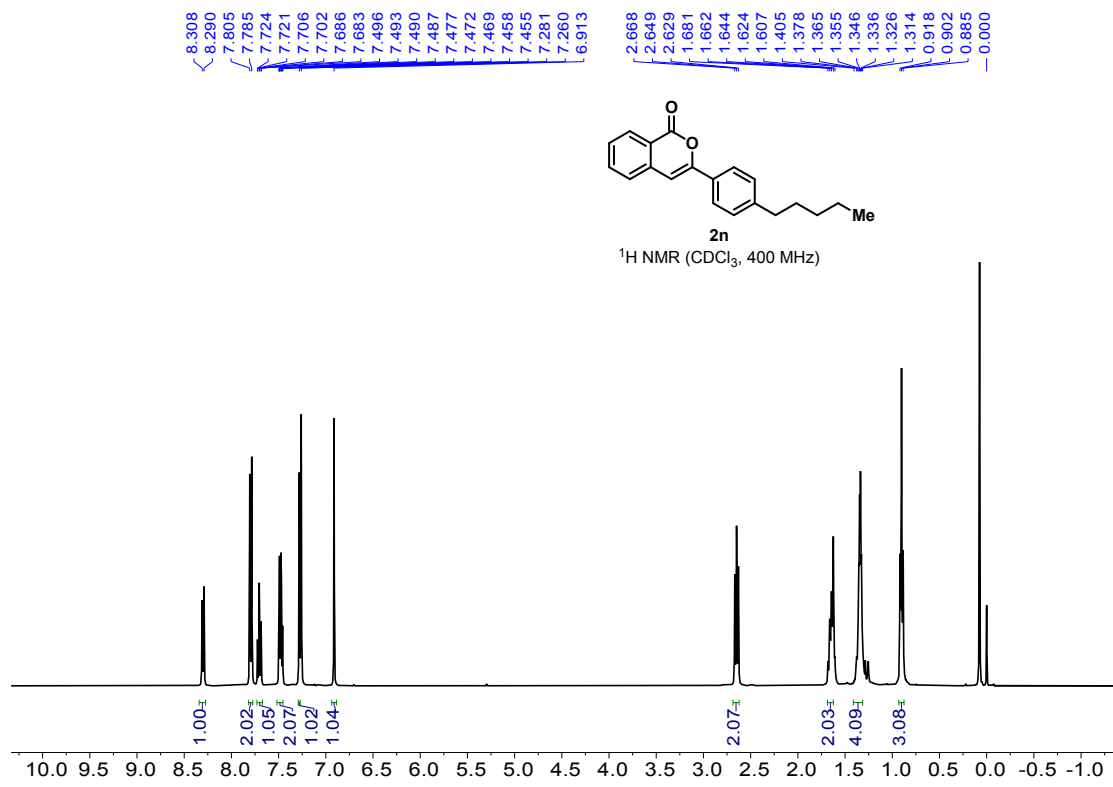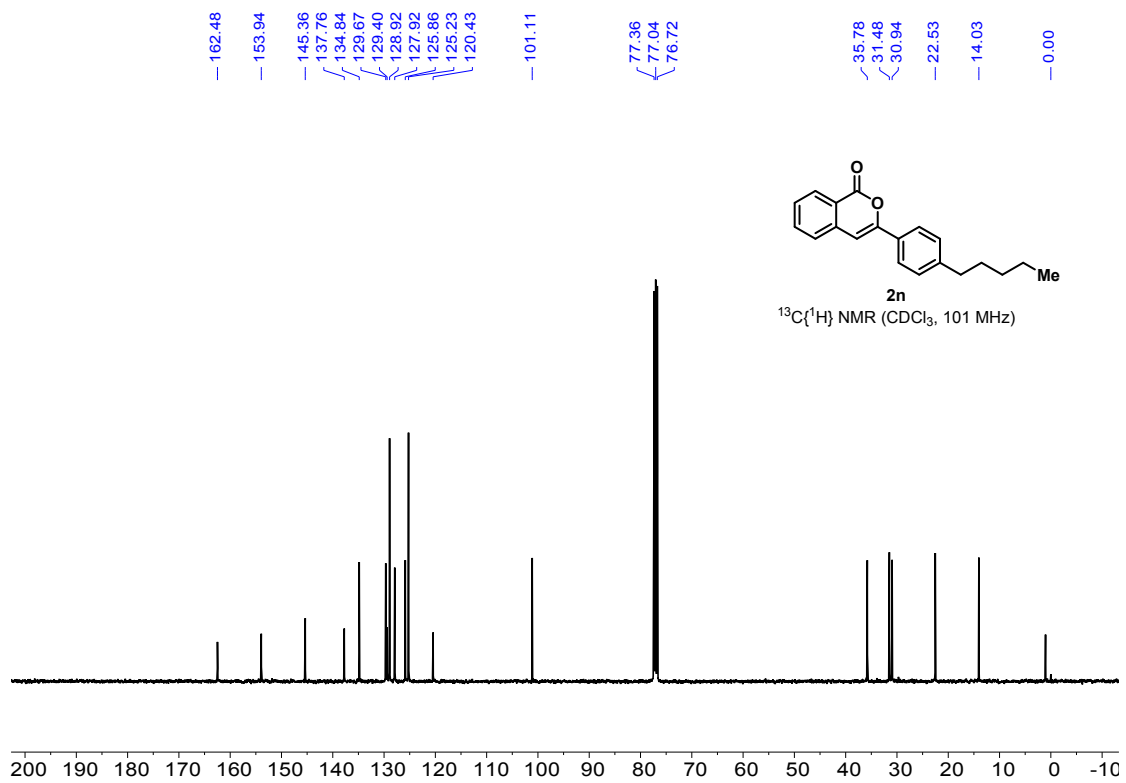



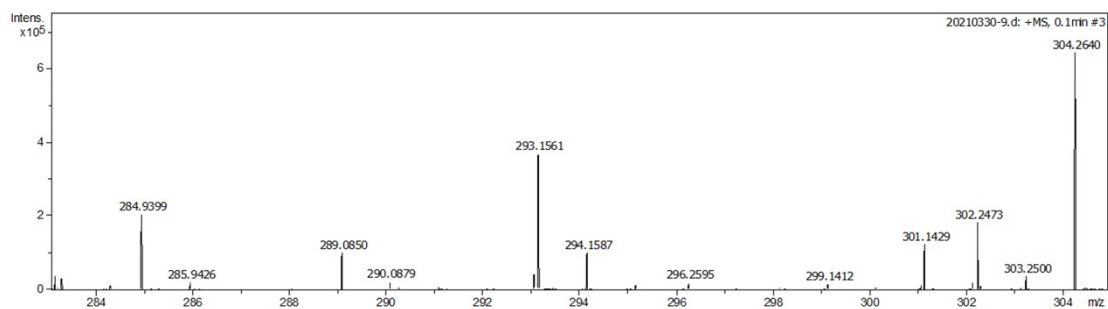

(2n) HRMS (ESI-TOF)  $m/z$  calcd for  $C_{20}H_{21}O_2$   $[M + H]^+$ : 293.1536, found 293.1561.

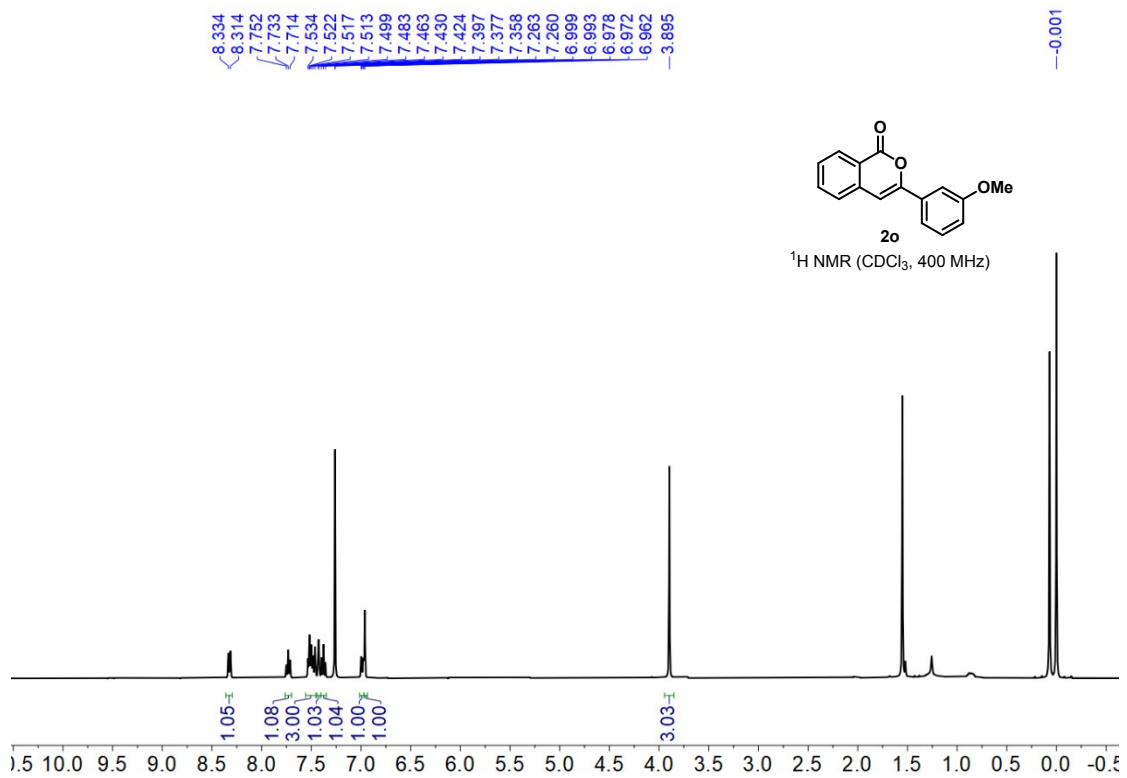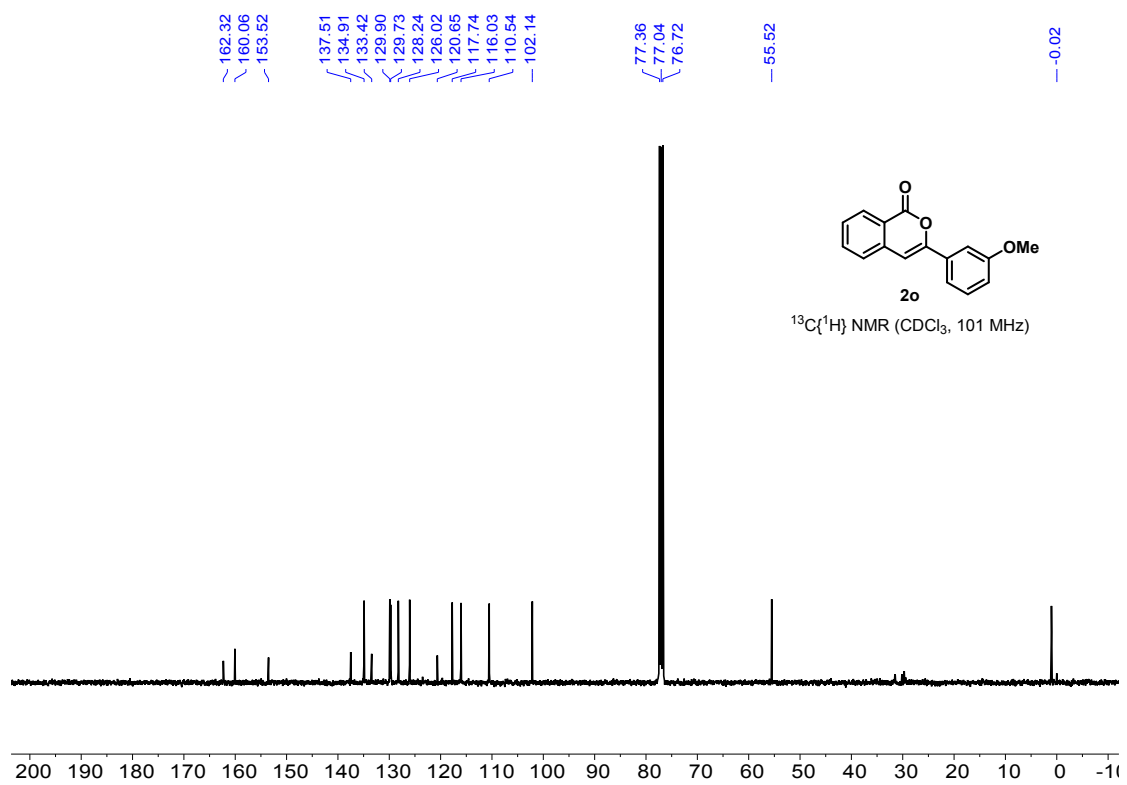

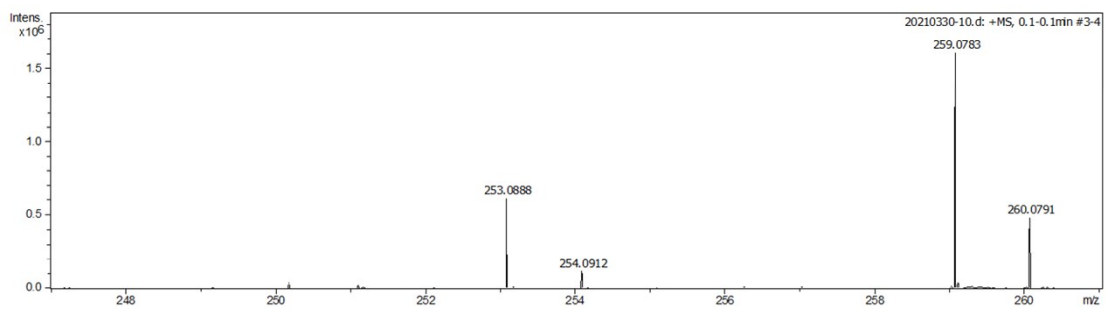

(**2o**) HRMS (ESI-TOF)  $m/z$  calcd for  $C_{16}H_{13}O_3 [M + H]^+$ : 253.0859, found 253.0888.

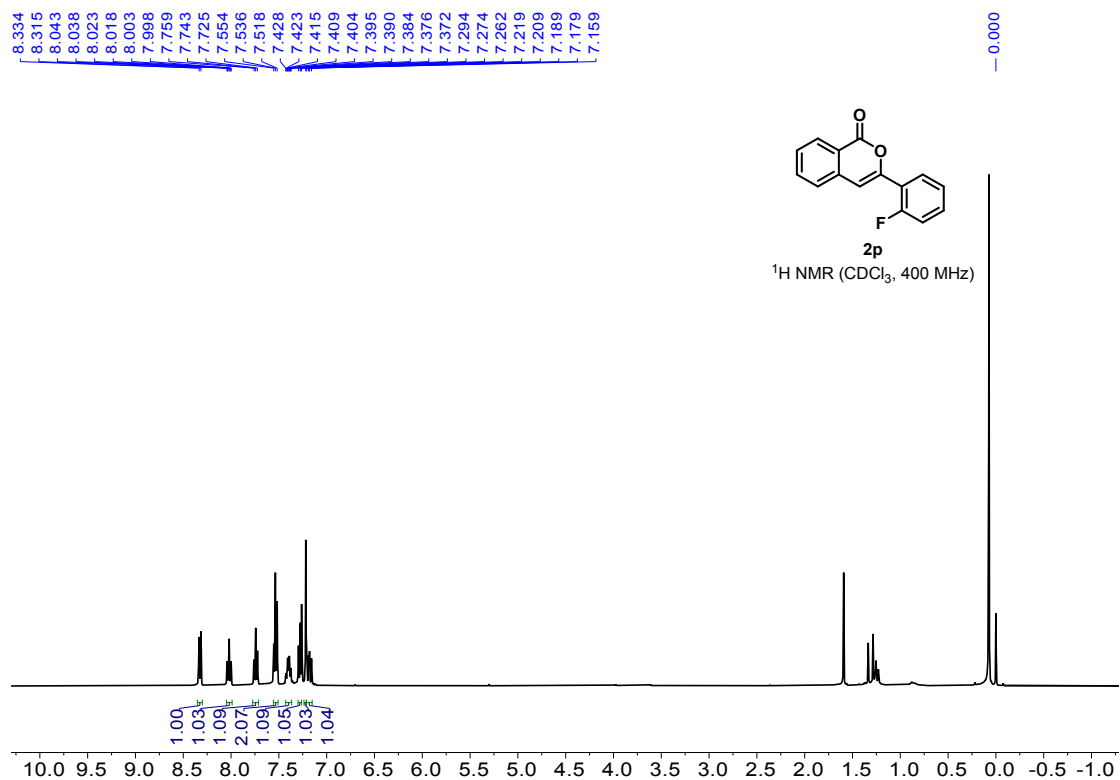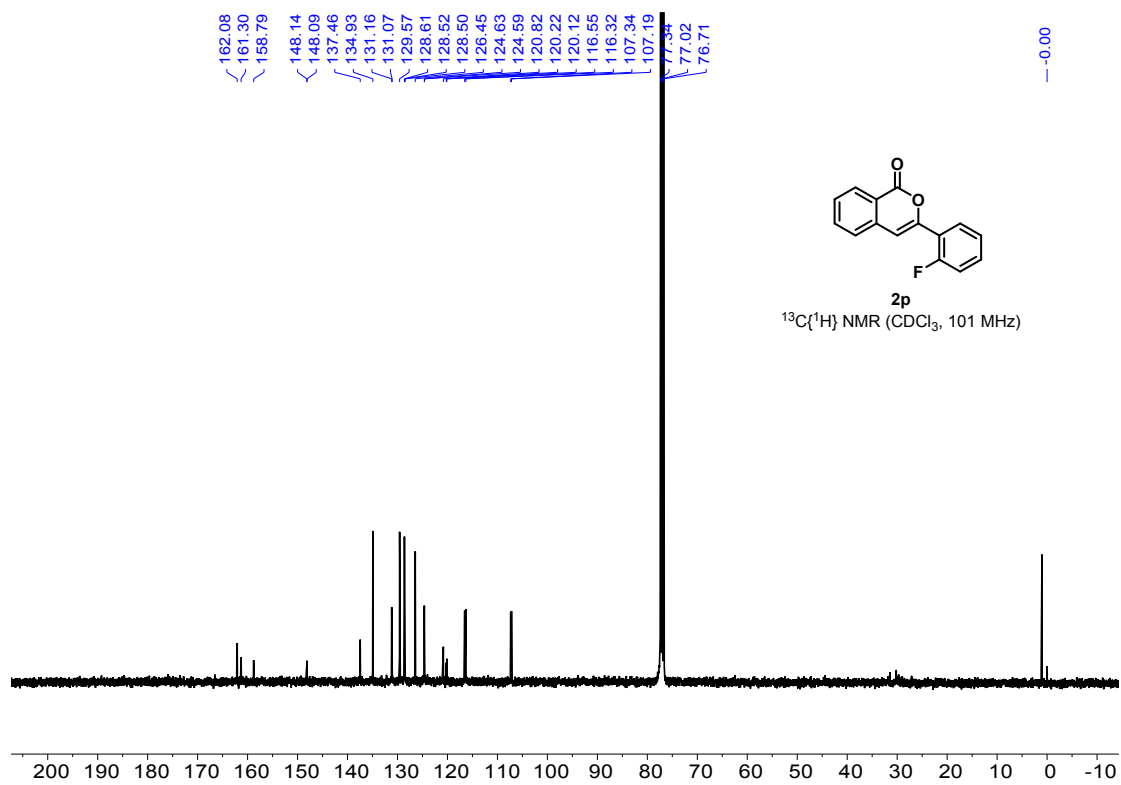

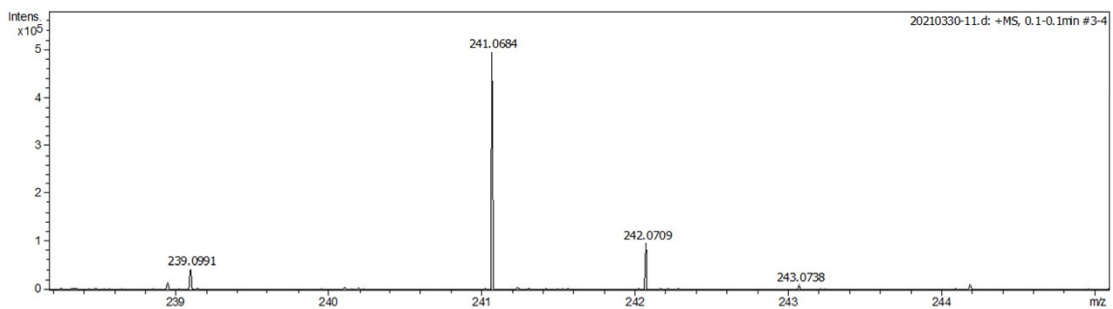

**(2p)** HRMS (ESI-TOF)  $m/z$  calcd for  $C_{15}H_{10}FO_2$   $[M + H]^+$ : 241.0659, found 241.0684.

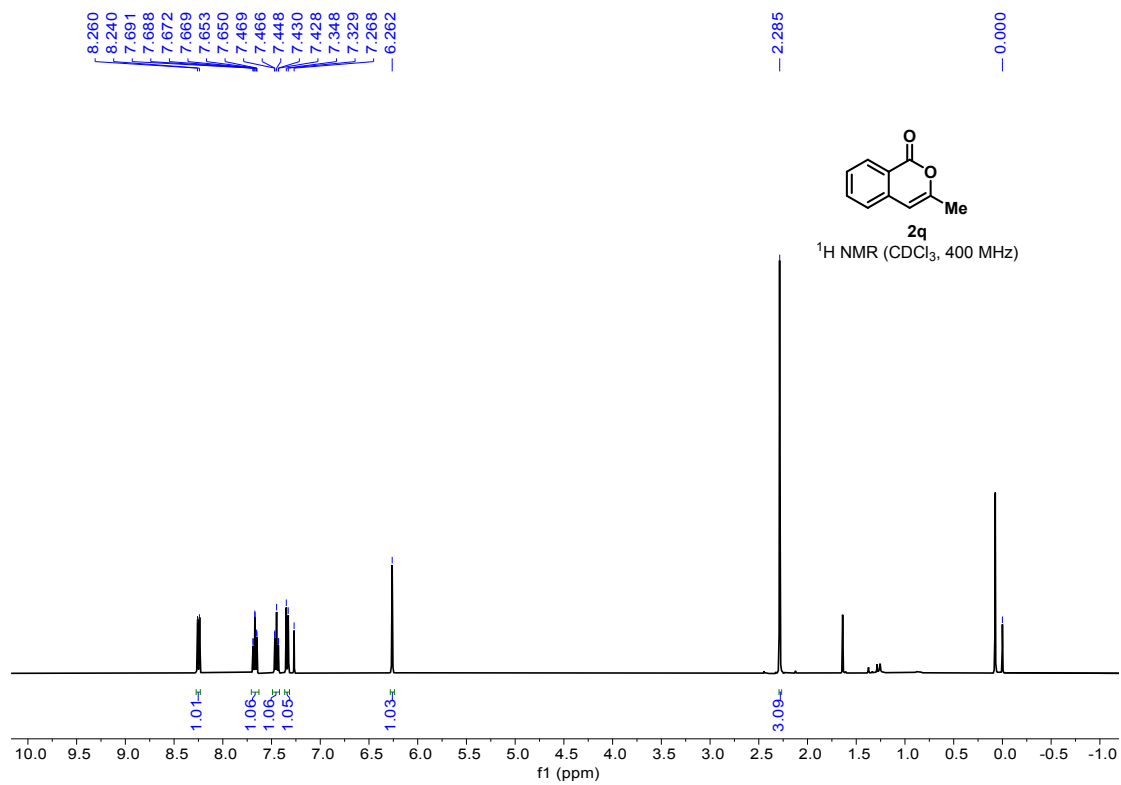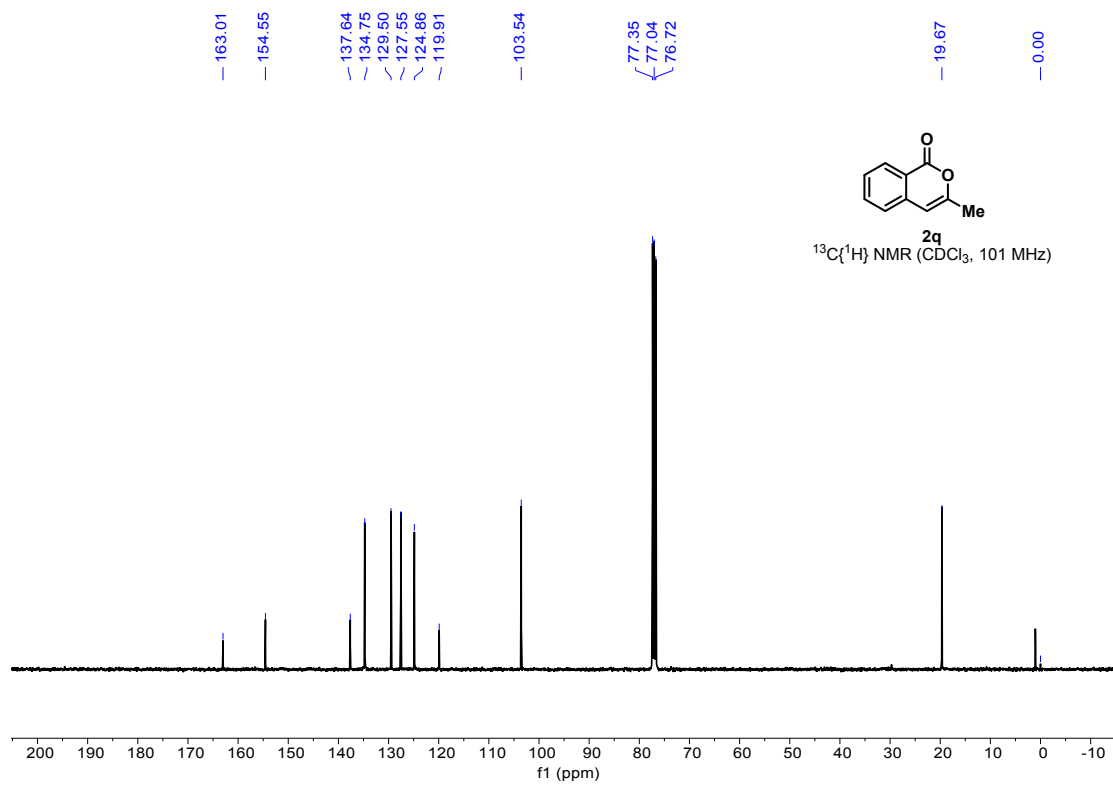

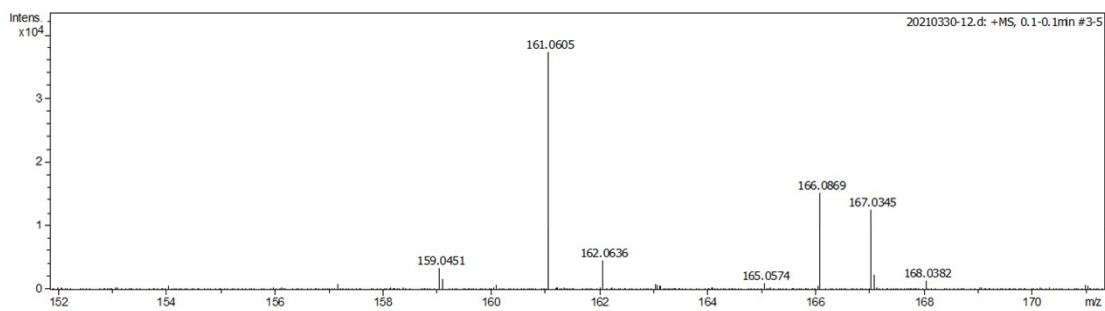

**(2q)** HRMS (ESI-TOF)  $m/z$  calcd for  $C_{10}H_9O_2$   $[M + H]^+$ : 161.0597, found 161.0605.

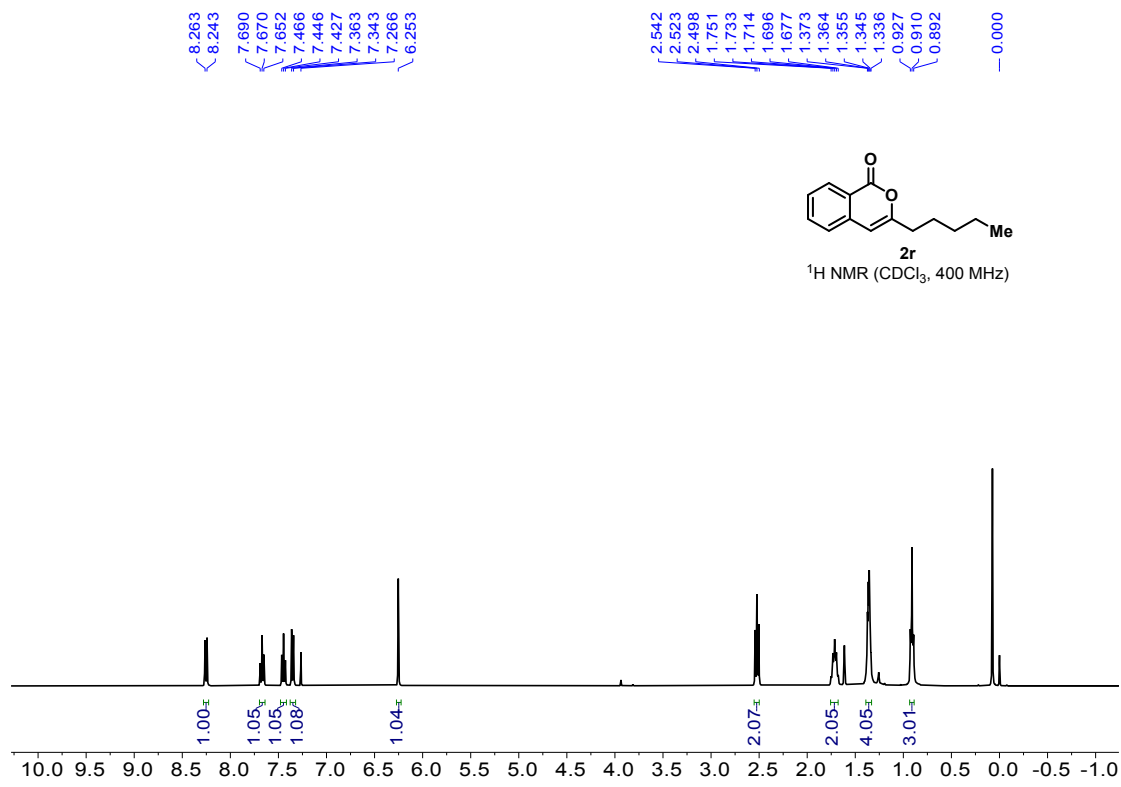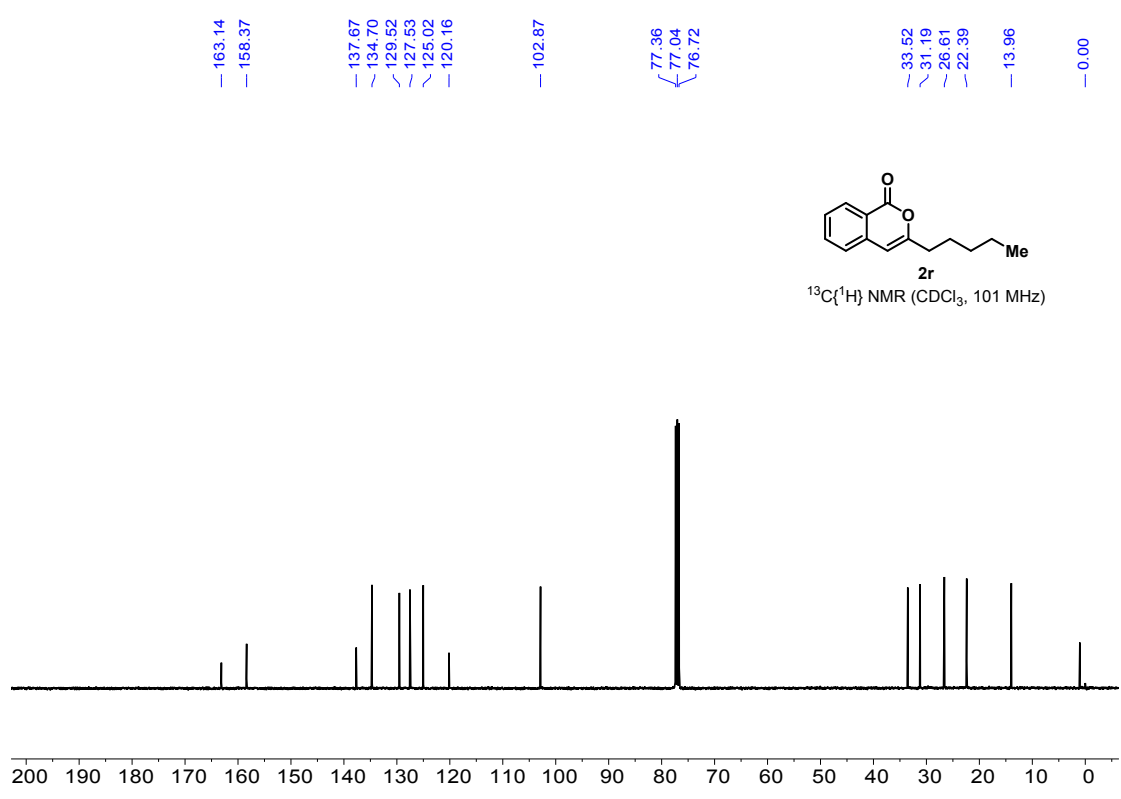



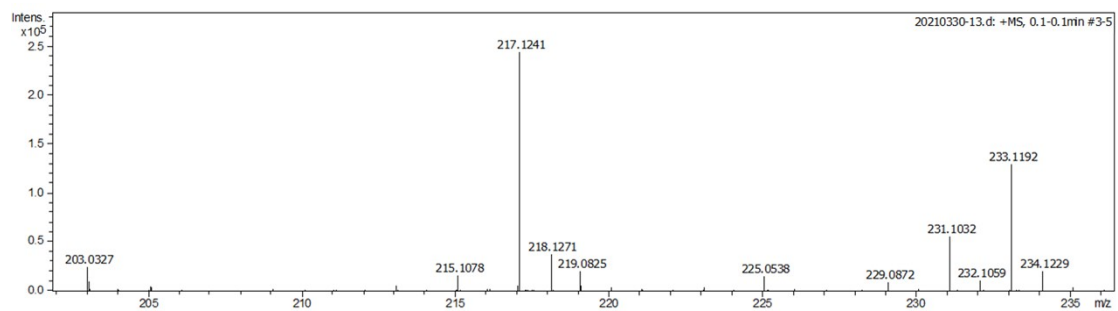

(2r) HRMS (ESI-TOF)  $m/z$  calcd for  $C_{14}H_{17}O_2$   $[M + H]^+$ : 217.1223, found 217.1241.

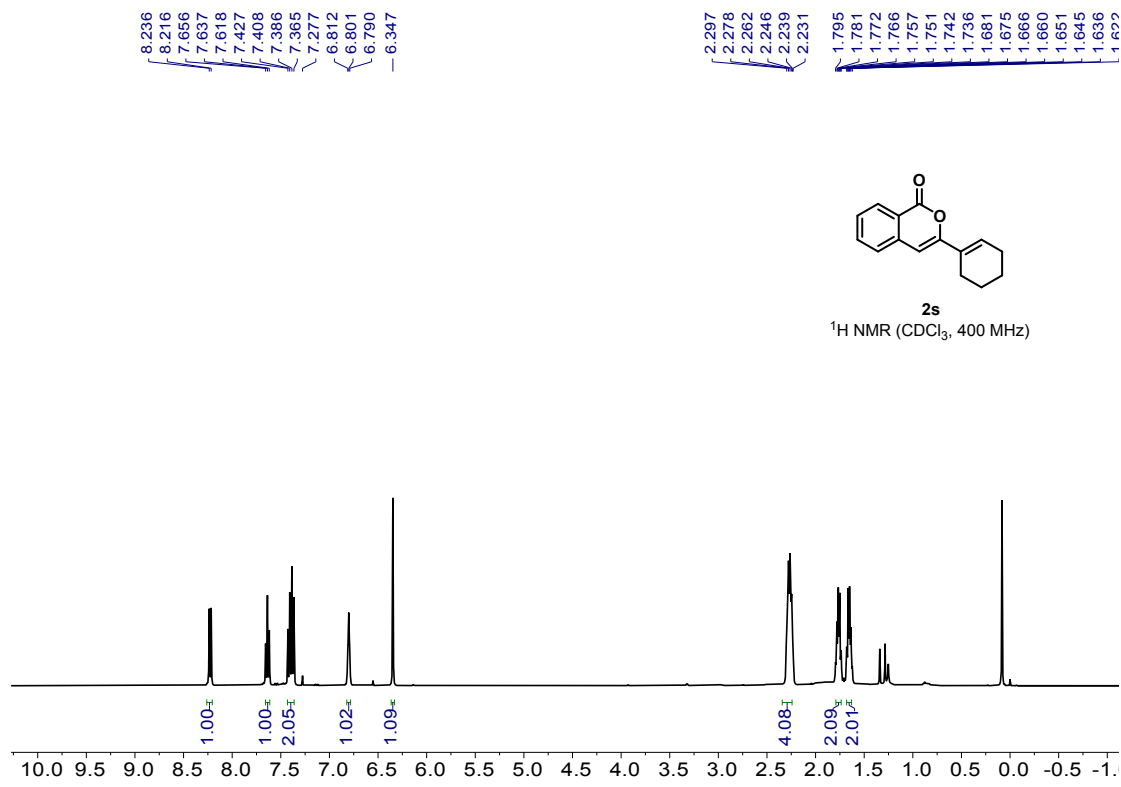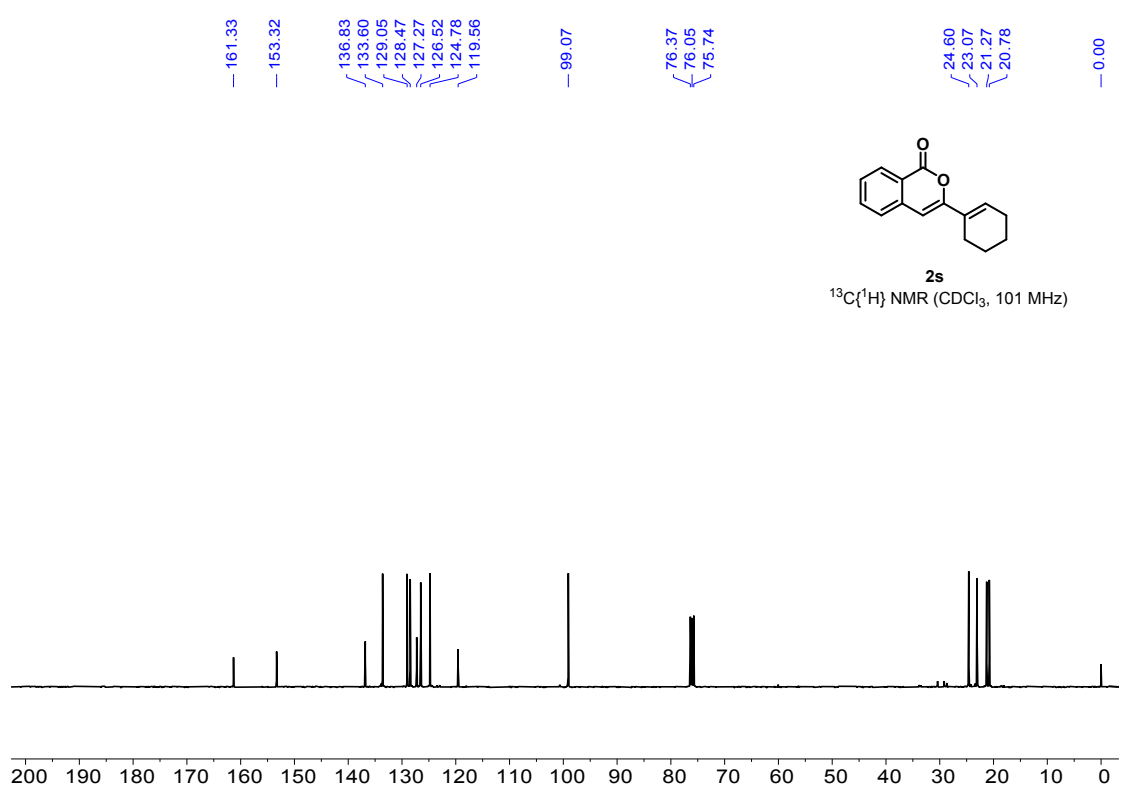

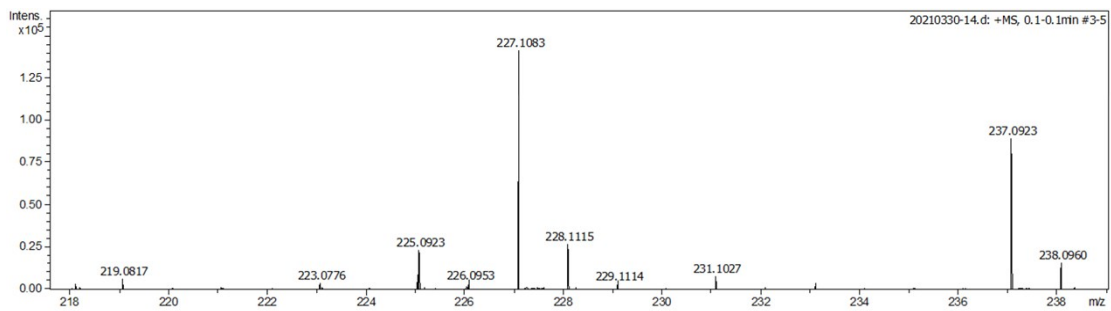

(2s) HRMS (ESI-TOF)  $m/z$  calcd for  $C_{15}H_{15}O_2$   $[M + H]^+$ : 227.1067, found 227.1083.

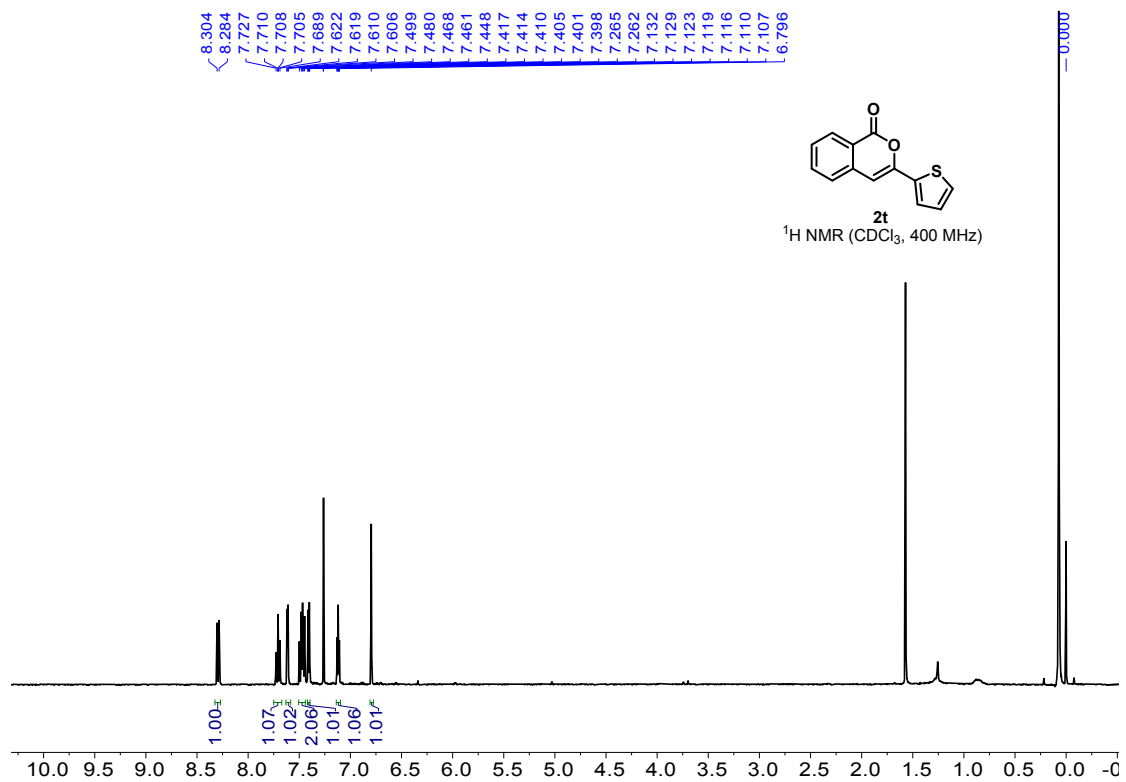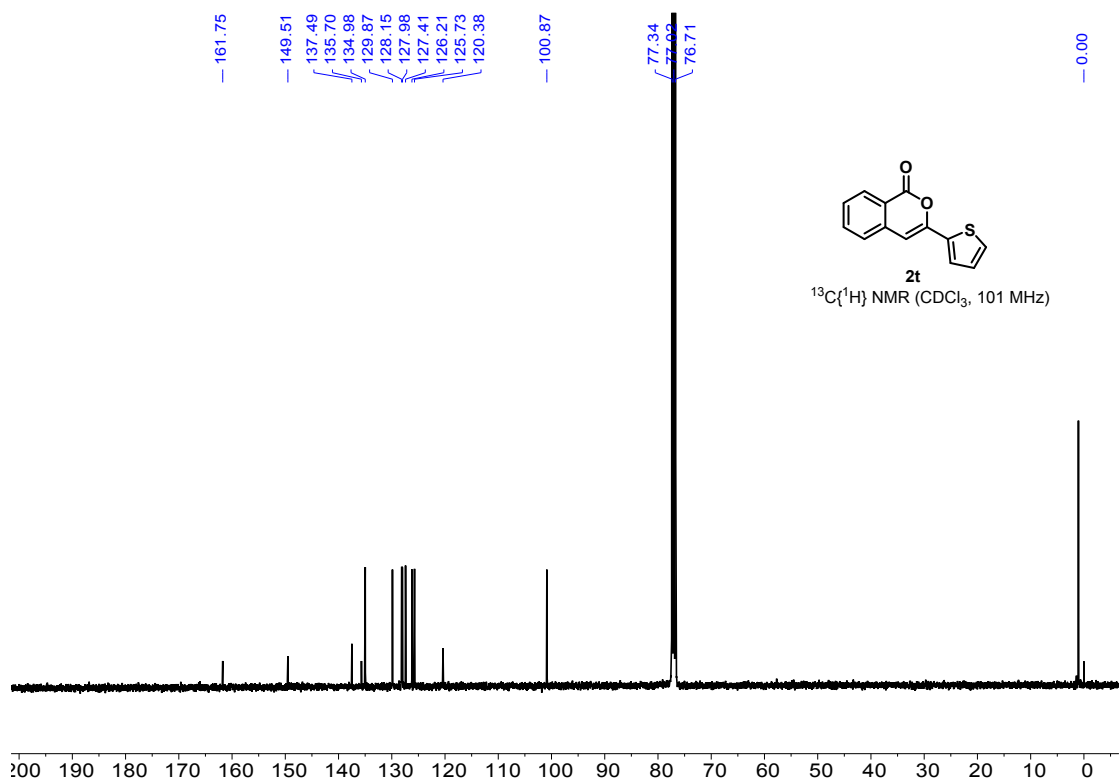

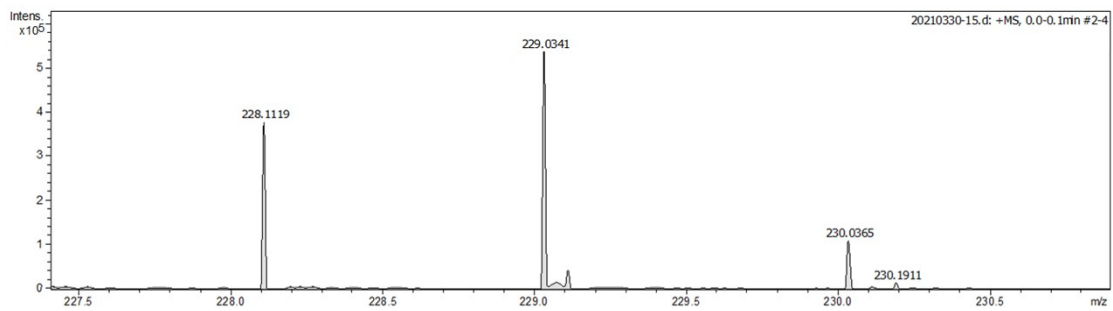

(2t) HRMS (ESI-TOF)  $m/z$  calcd for  $C_{13}H_9O_2S [M + H]^+$ : 229.0318, found 229.0341.

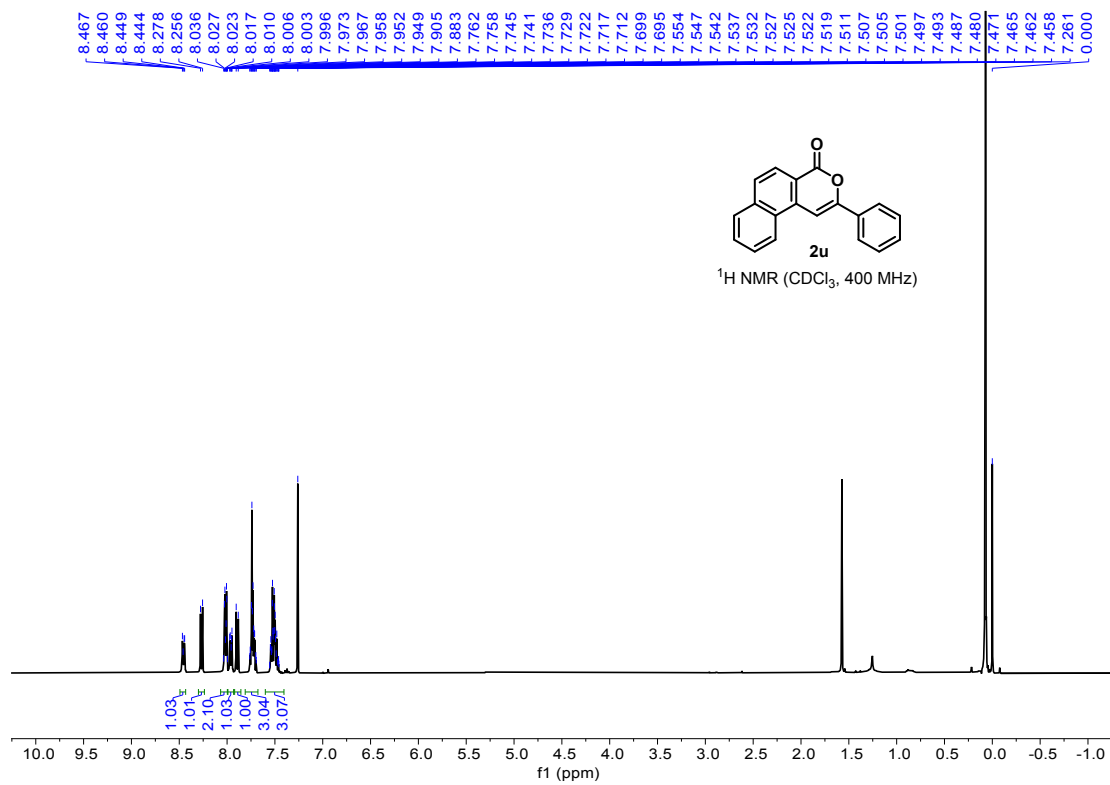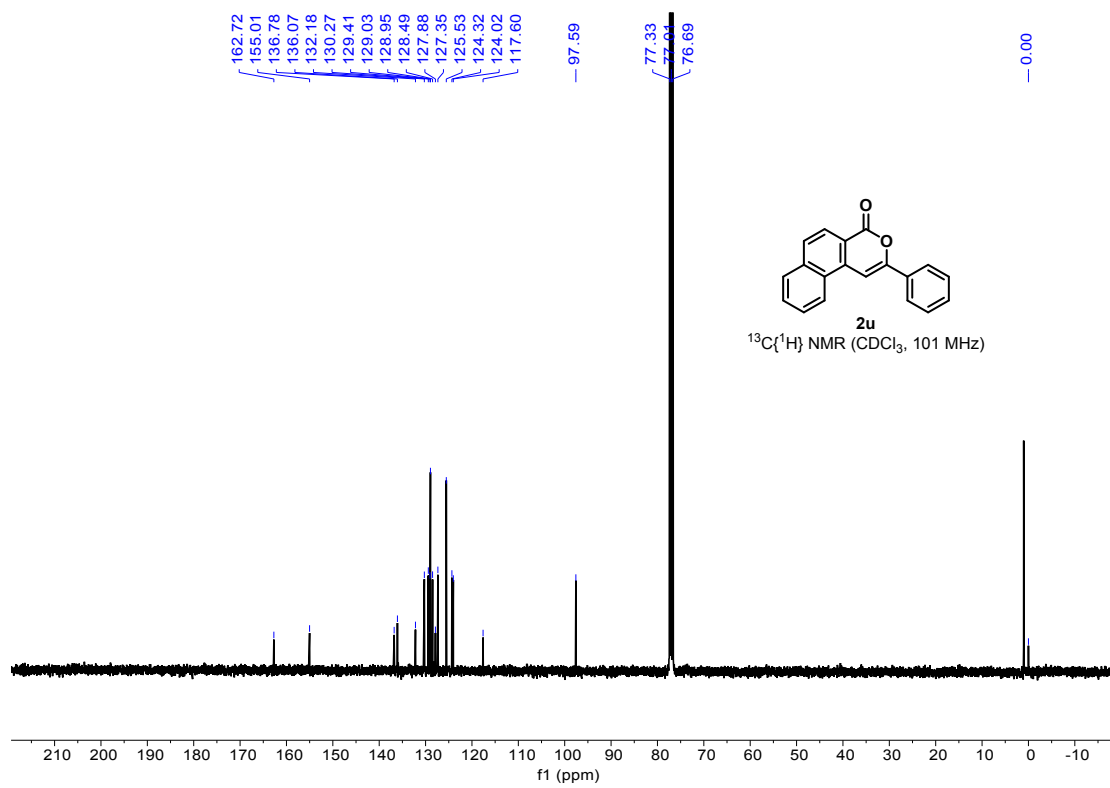

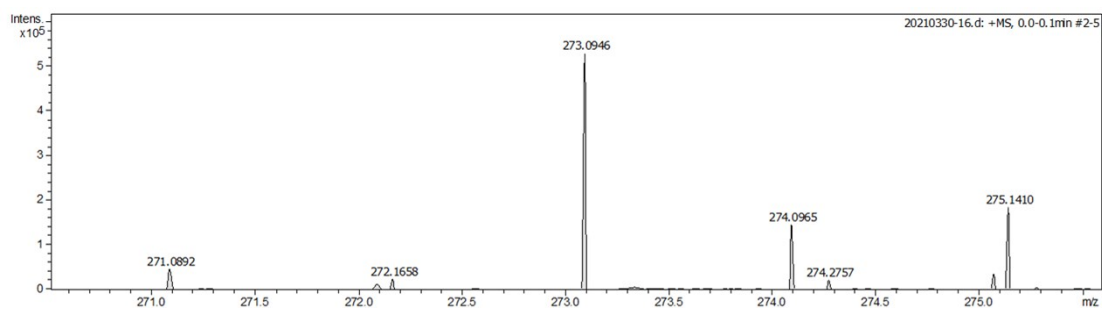

(**2u**) HRMS (ESI-TOF)  $m/z$  calcd for  $C_{19}H_{13}O_2$   $[M + H]^+$ : 273.0910, found 273.0946.

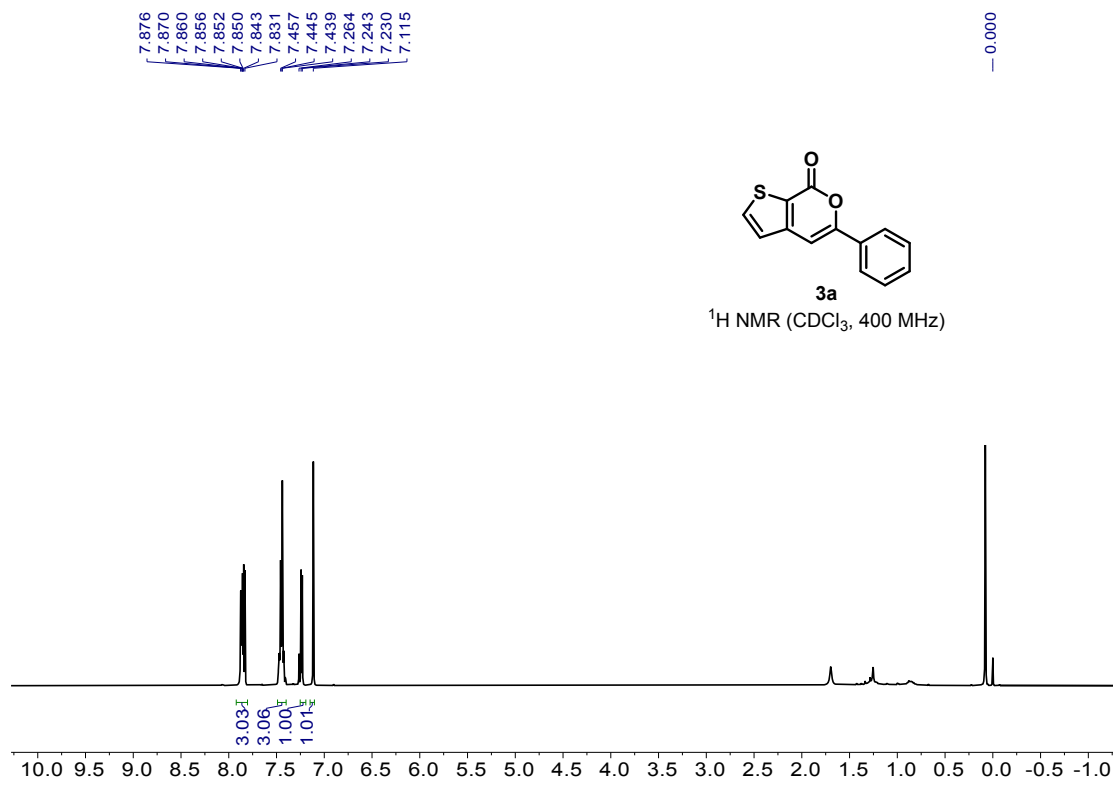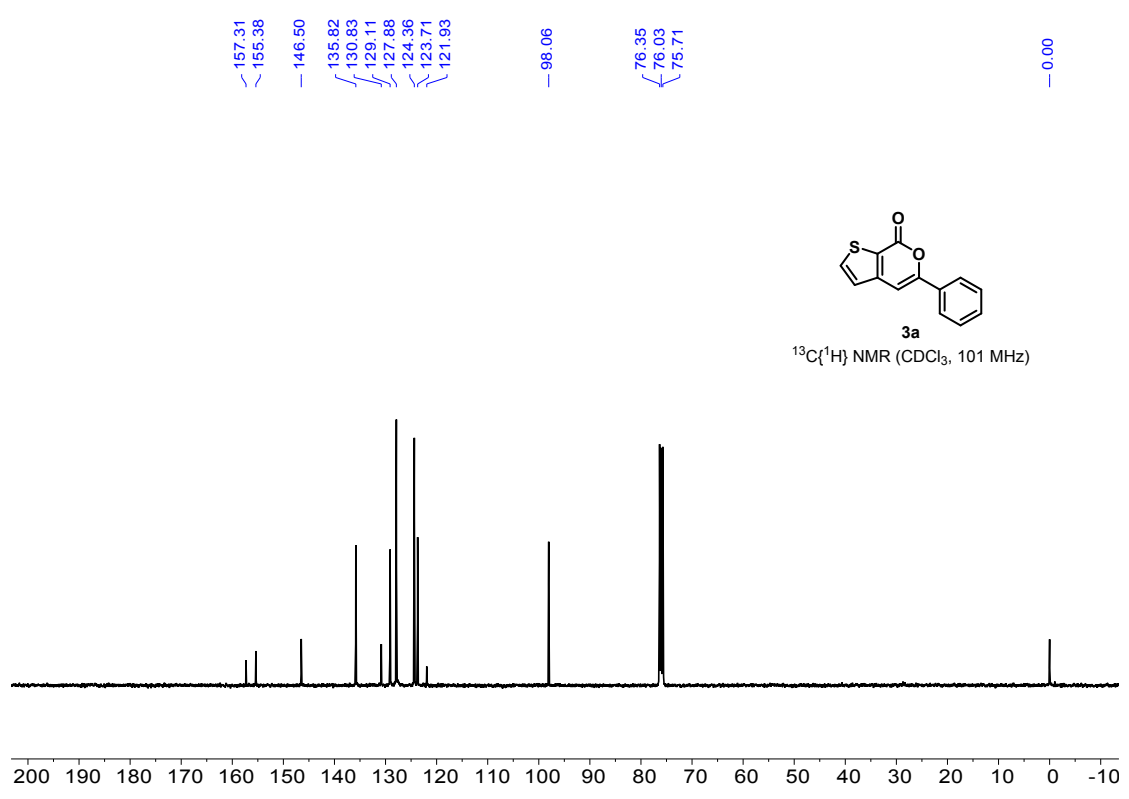



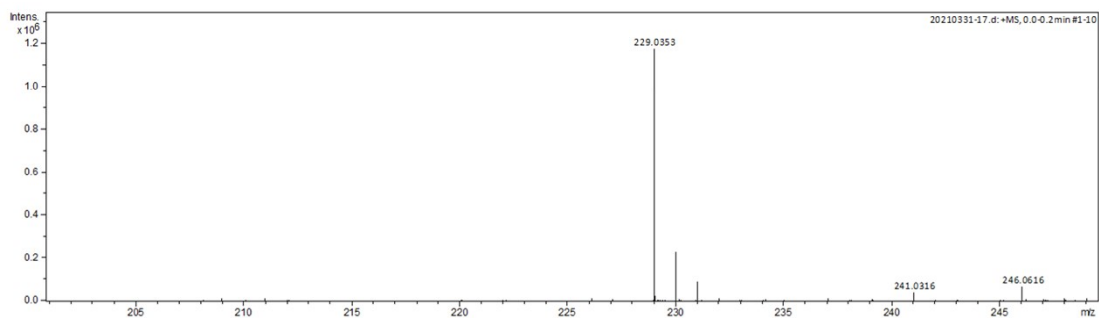

**(3a) HRMS (ESI-TOF)  $m/z$  calcd for  $C_{13}H_9O_2S [M + H]^+$ : 229.0318, found 229.0353.**

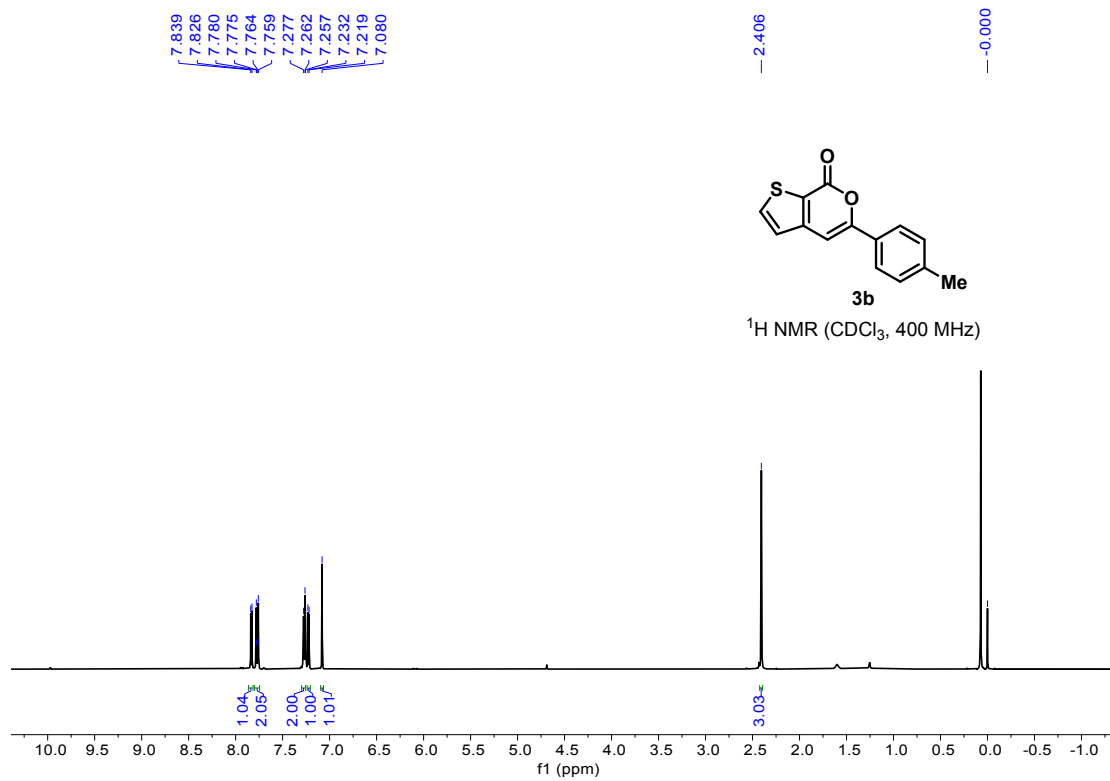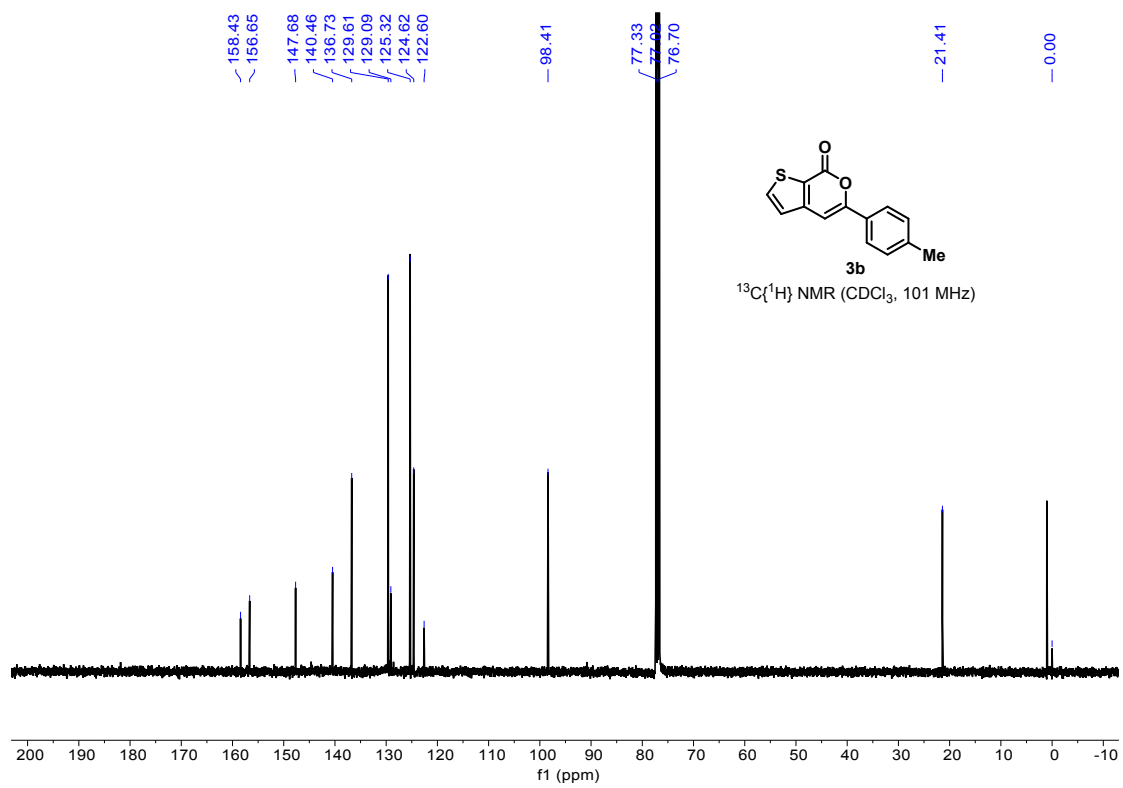

20210415\_002 #2534-2540 RT: 8.87-8.88 AV: 7 SB: 2 3.00 , 3.00 NL: 1.05E9  
T: FTMS + p EI Full ms [50.0000-750.0000]

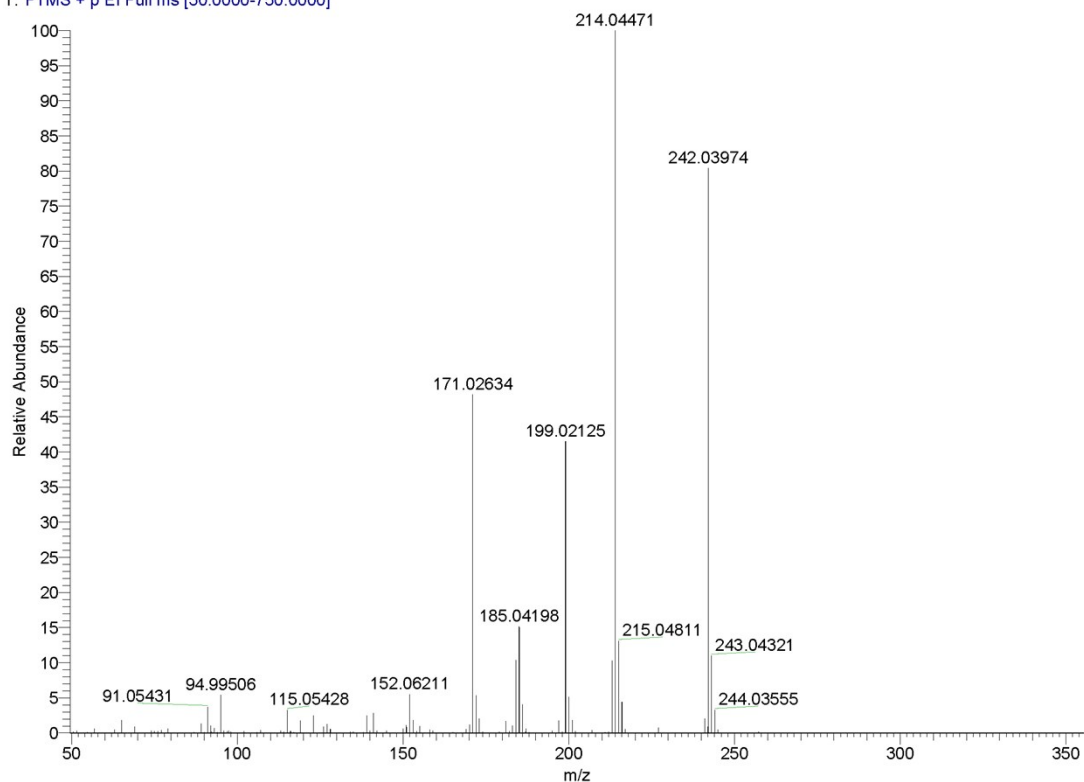

**(3b) HRMS (EI)  $m/z$  calcd for  $C_{14}H_{11}O_2S [M]^+$ : 242.04015, found 242.03974.**

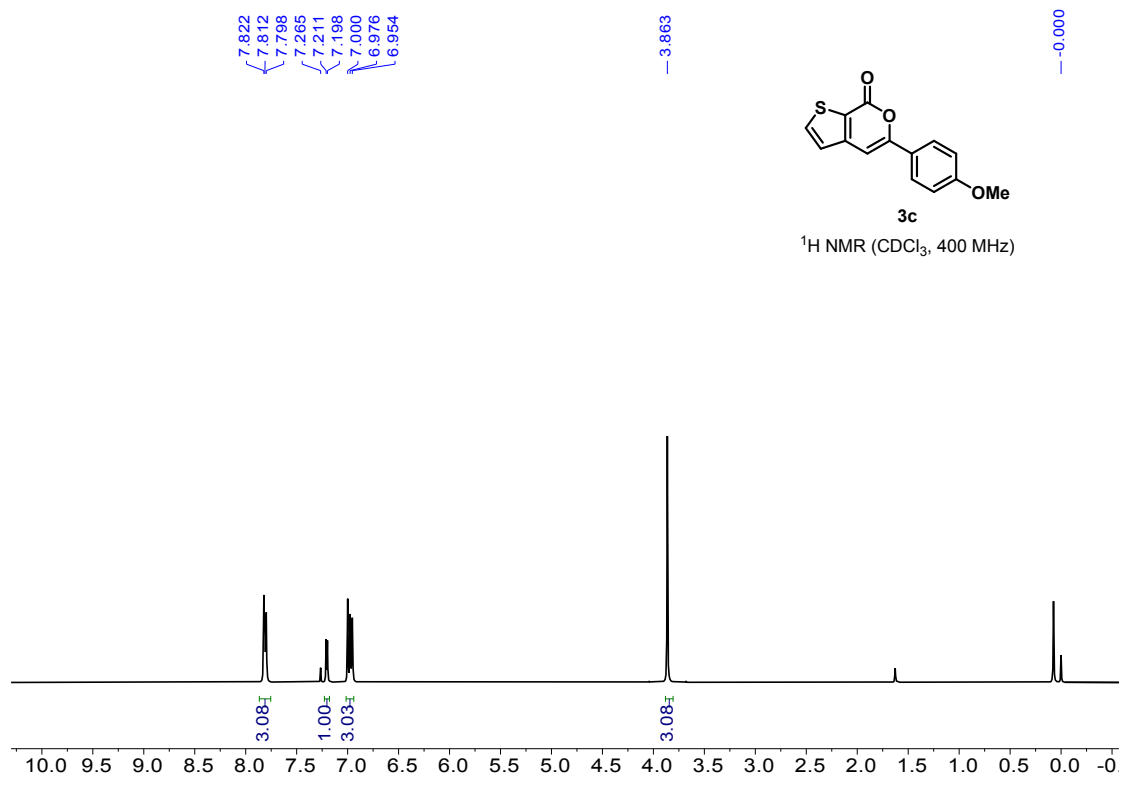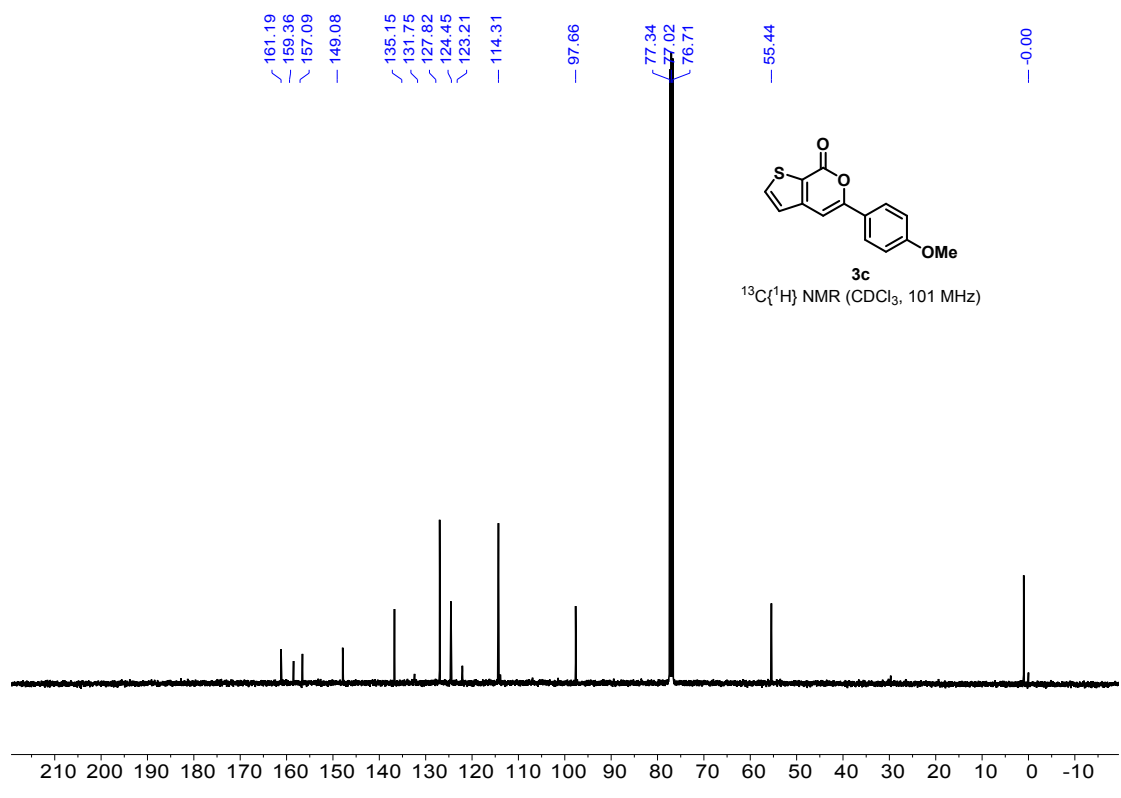

20210415\_003 #2738 RT: 9.35 AV: 1 SB: 2 3.00, 3.00 NL: 1.48E9  
T: FTMS + p EI Full ms [50.0000-750.0000]

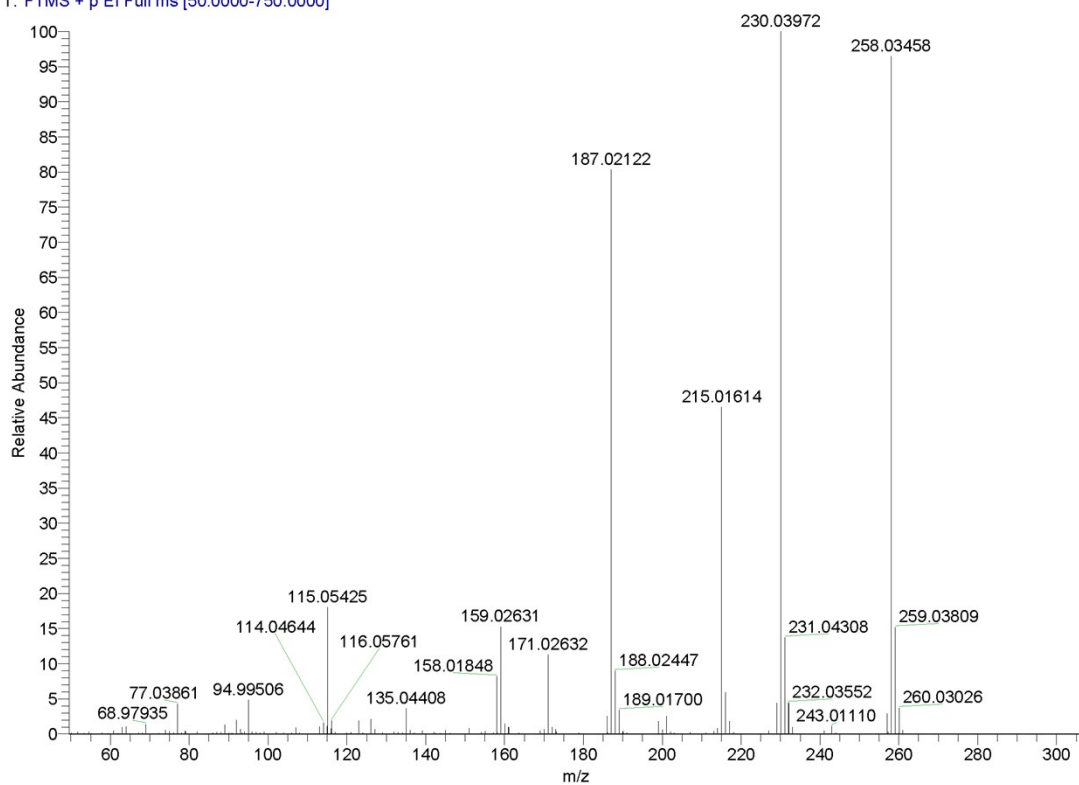

(3c) HRMS (EI)  $m/z$  calcd for  $C_{14}H_{10}O_3S$   $[M]^+$ : 258.03506, found 258.03458.

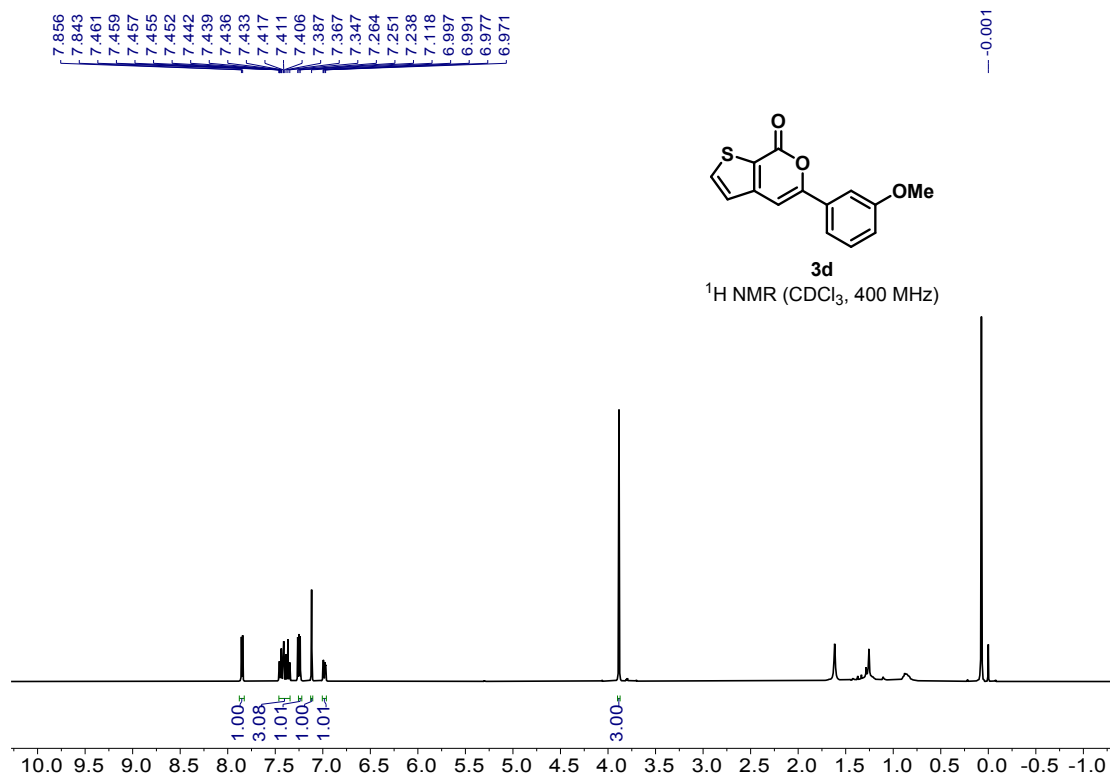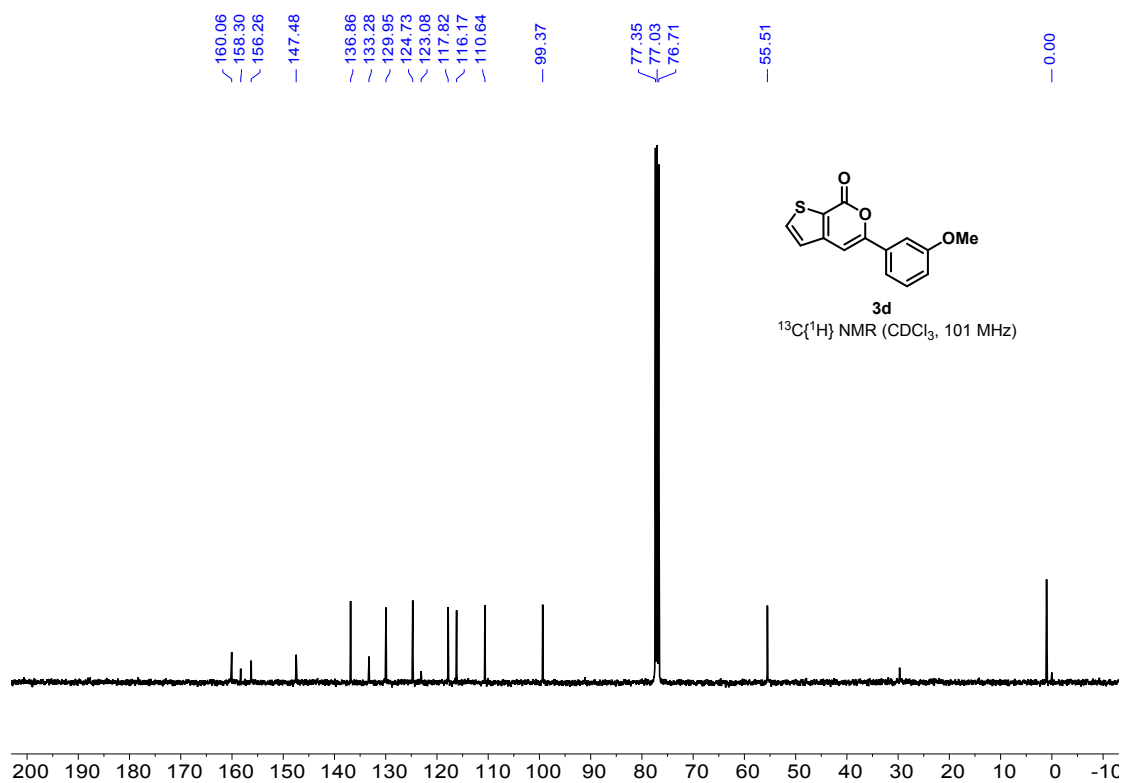

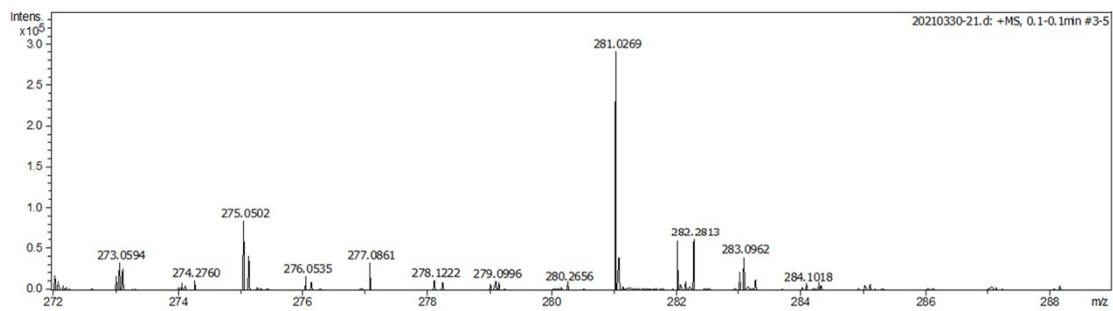

(3d) HRMS (ESI-TOF)  $m/z$  calcd for  $C_{14}H_{10}NaO_3S [M + Na]^+$ : 281.0243, found 281.0269.

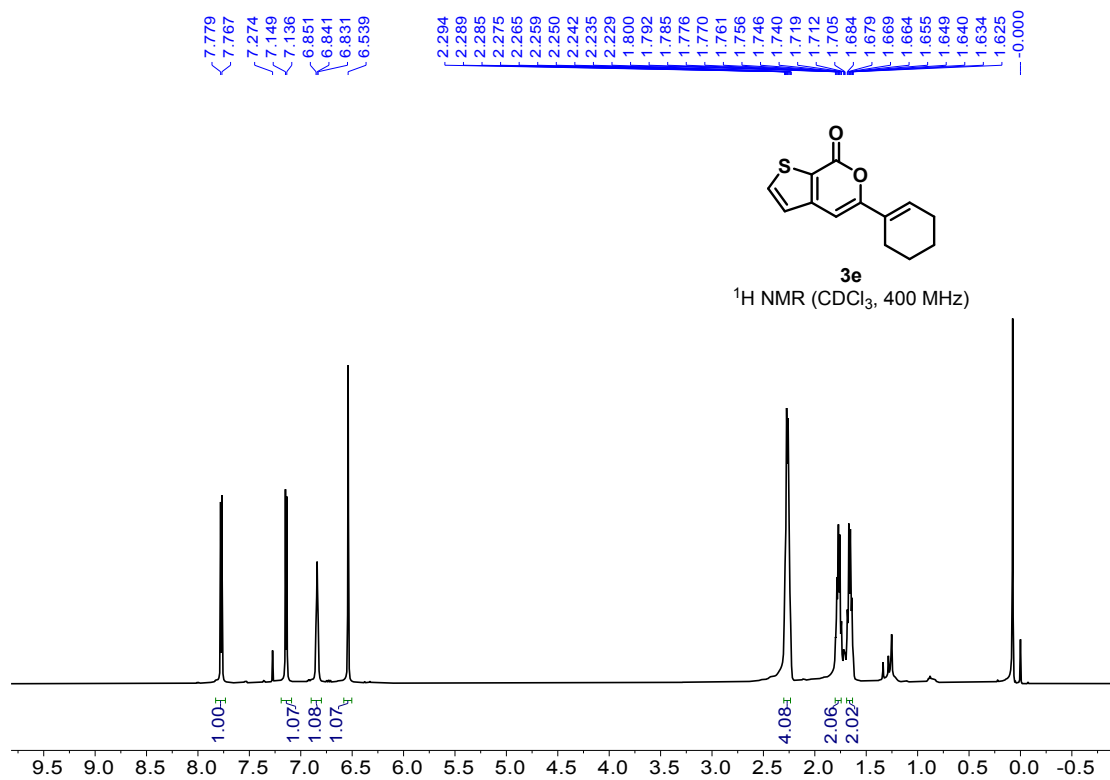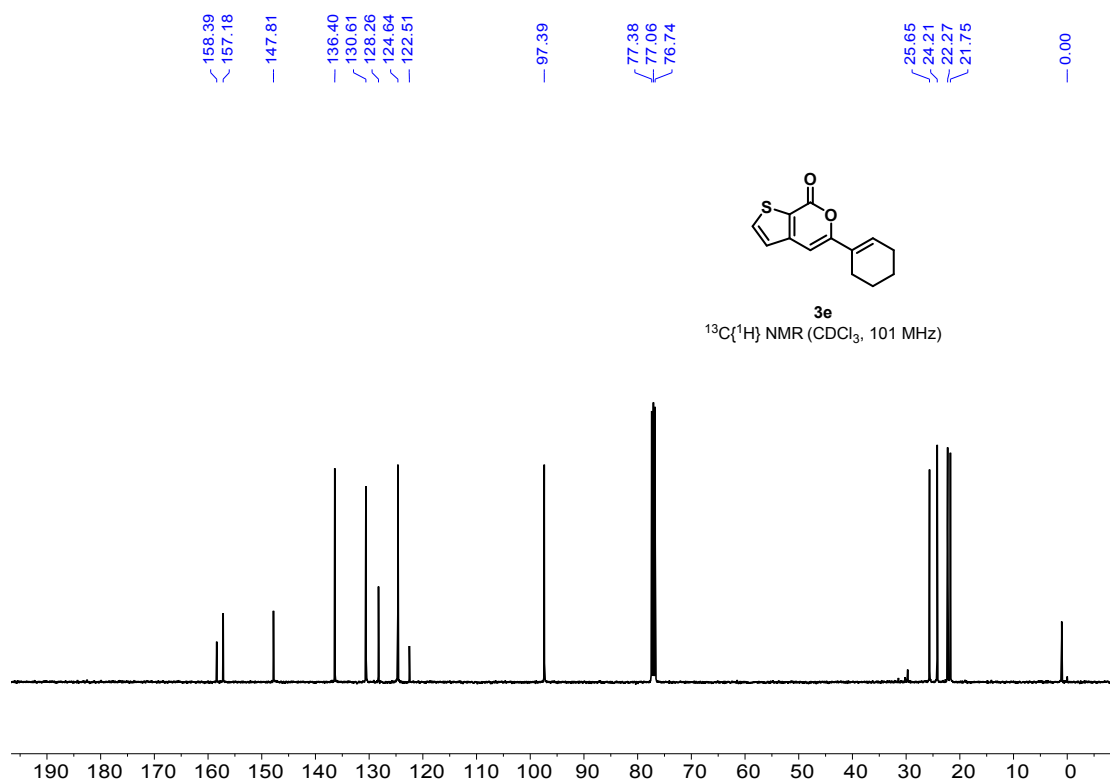



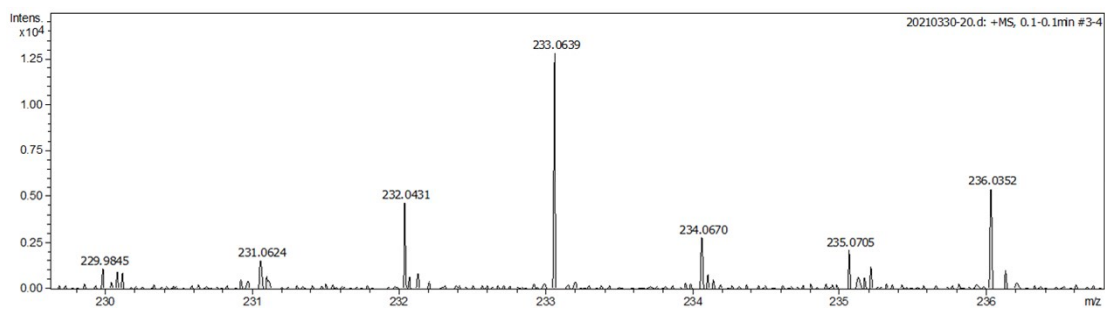

**(3e) HRMS (ESI-TOF)  $m/z$  calcd for  $C_{13}H_{13}O_2S [M + H]^+$ : 233.0631, found 233.0639.**

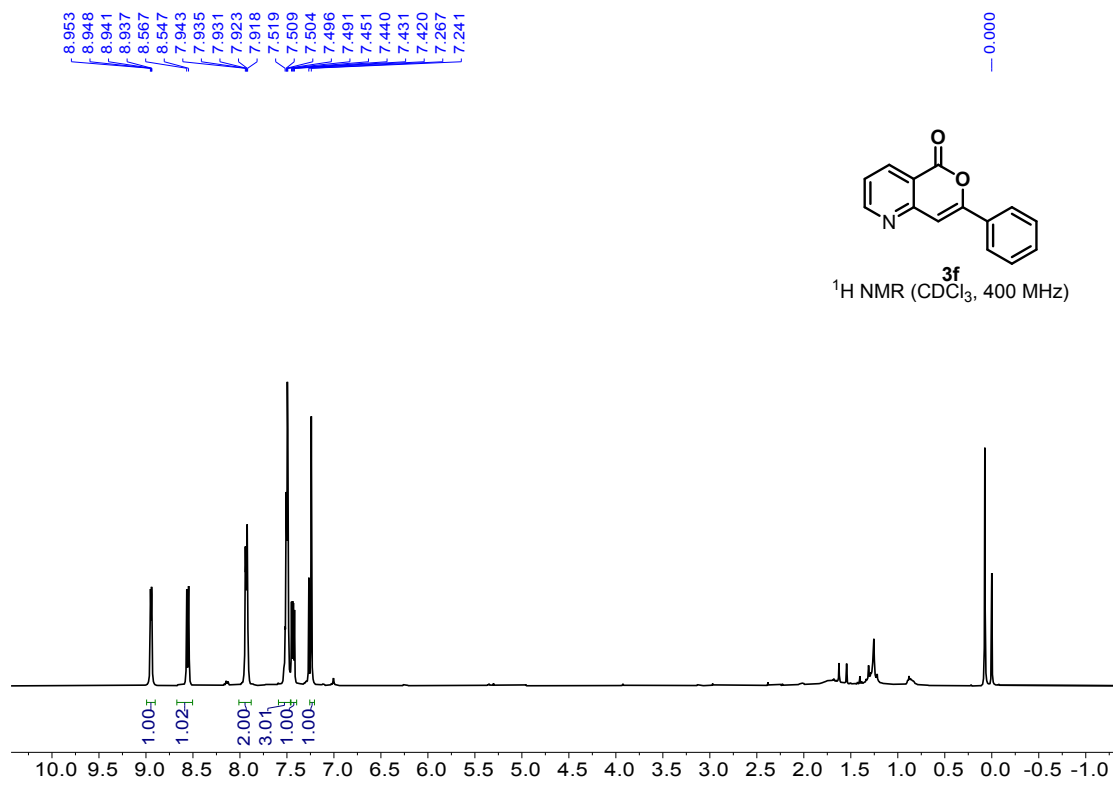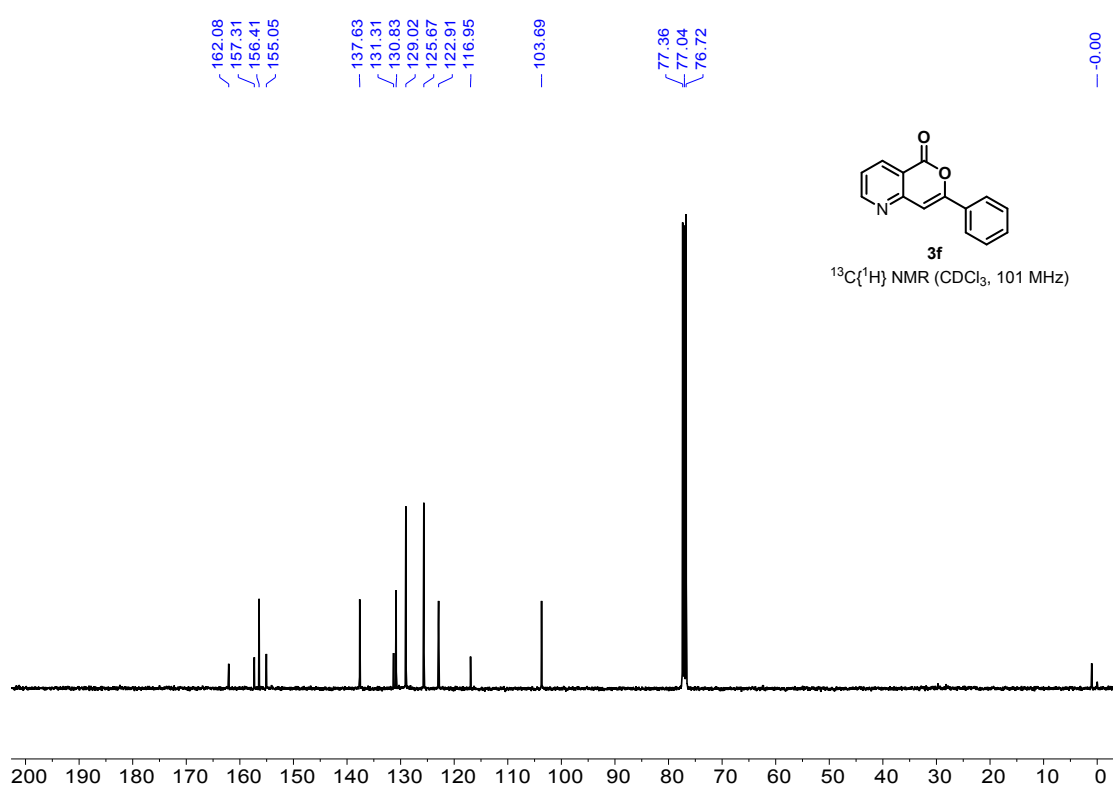

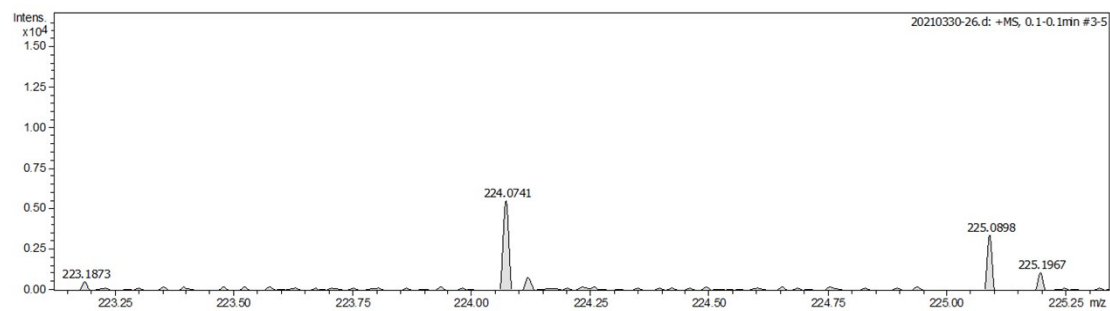

**(3f) HRMS (ESI-TOF)  $m/z$  calcd for  $C_{14}H_{10}NO_2$   $[M + H]^+$ : 224.0706, found 224.0741.**

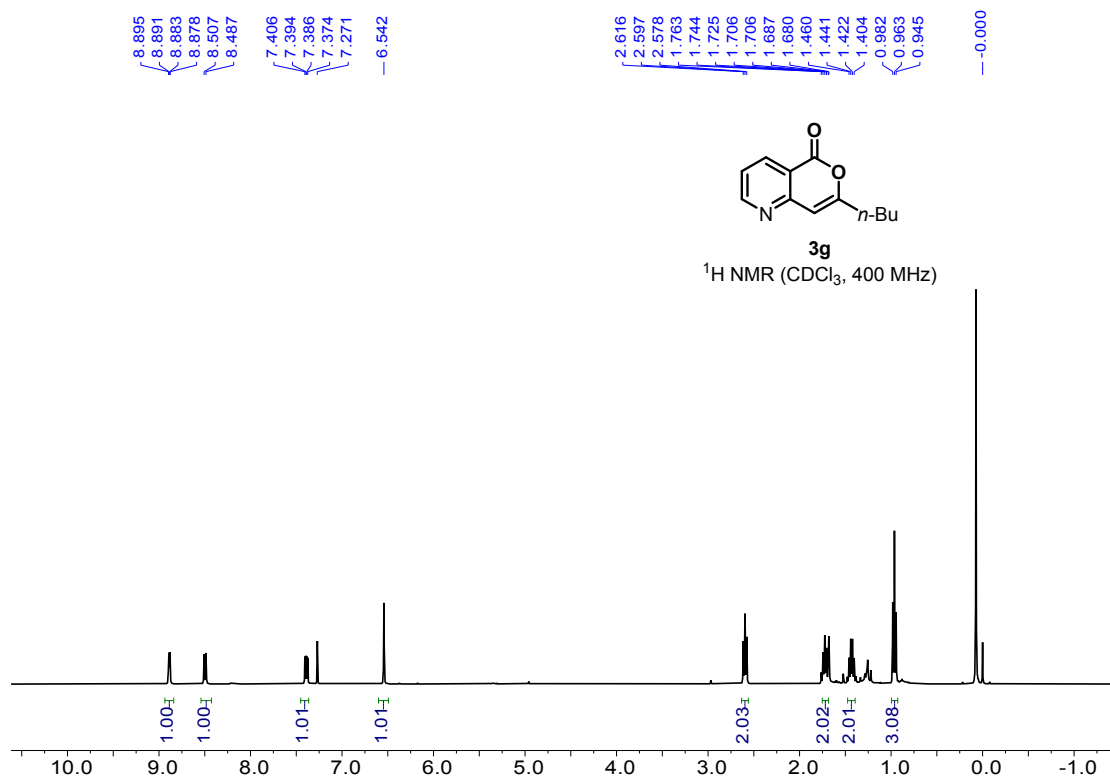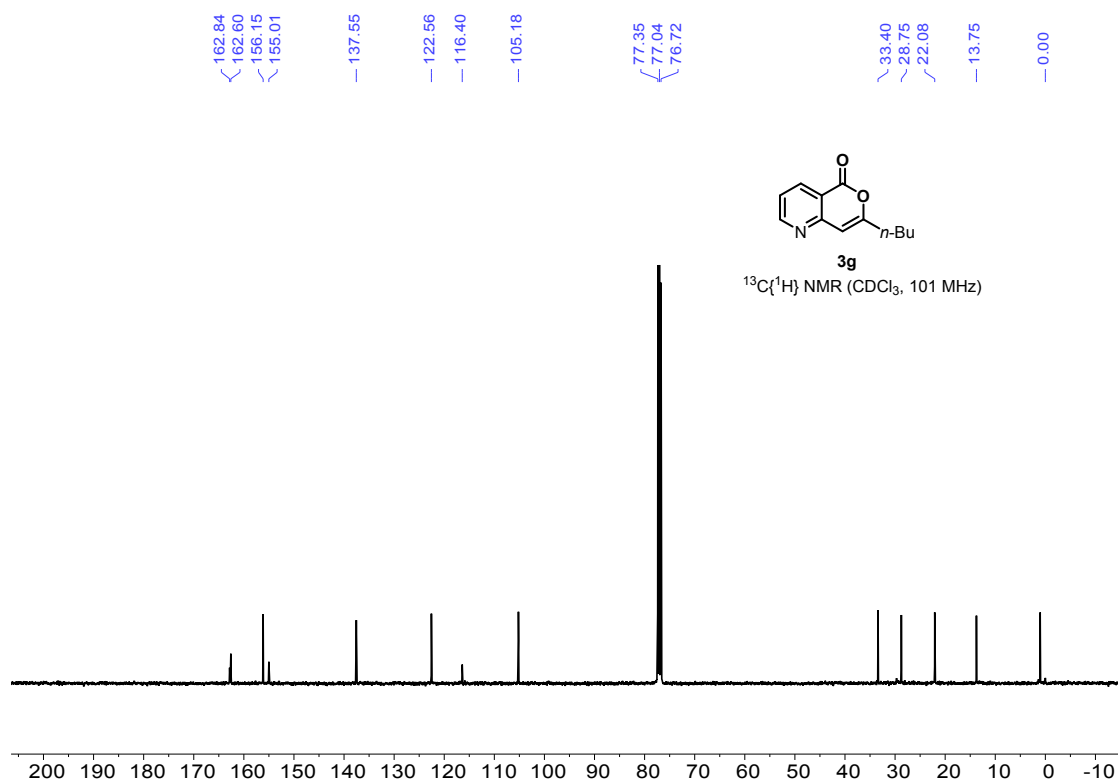

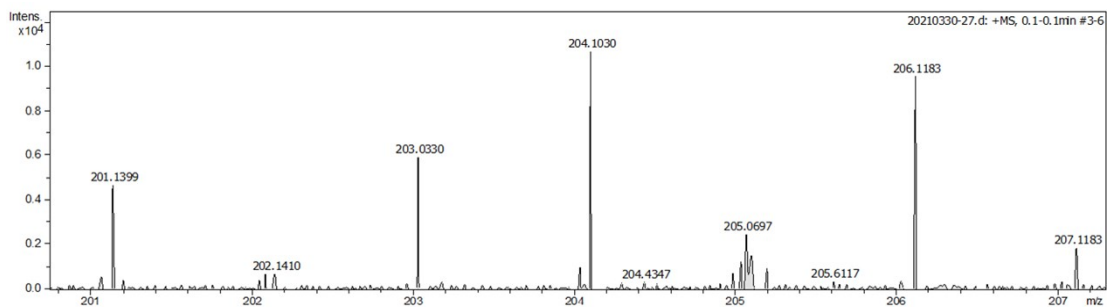

**(3g)** HRMS (ESI-TOF)  $m/z$  calcd for  $C_{12}H_{14}NO_2$   $[M + H]^+$ : 204.1019, found 204.1030.

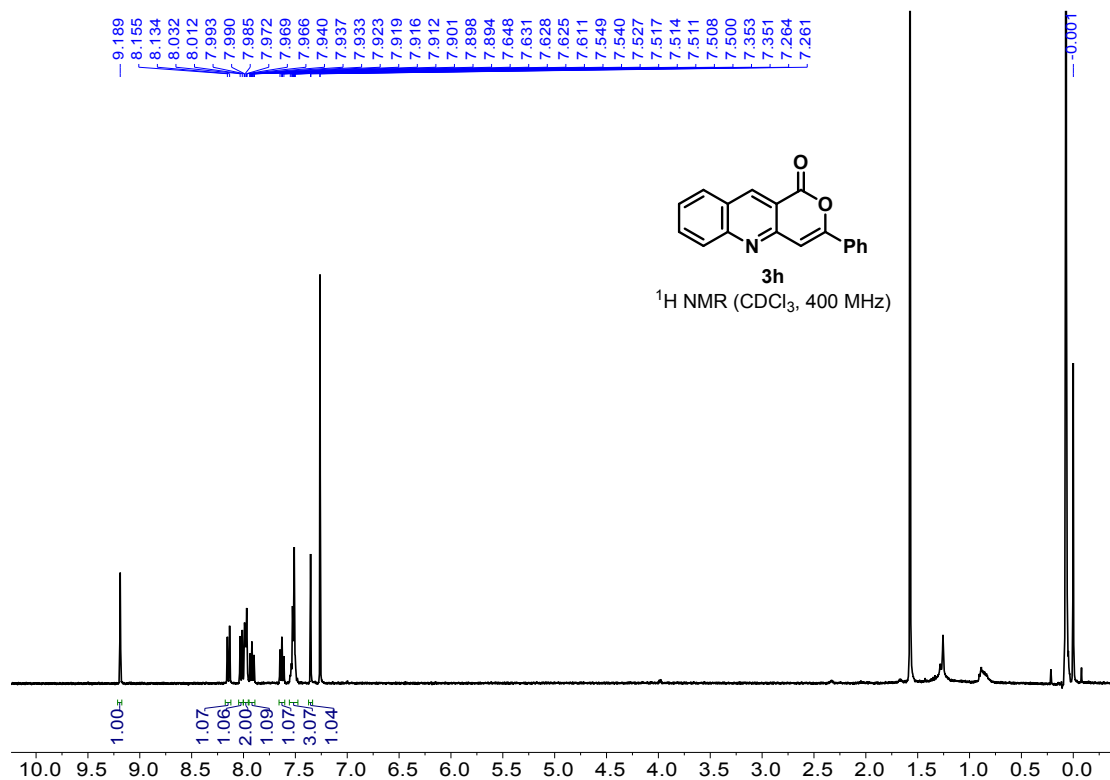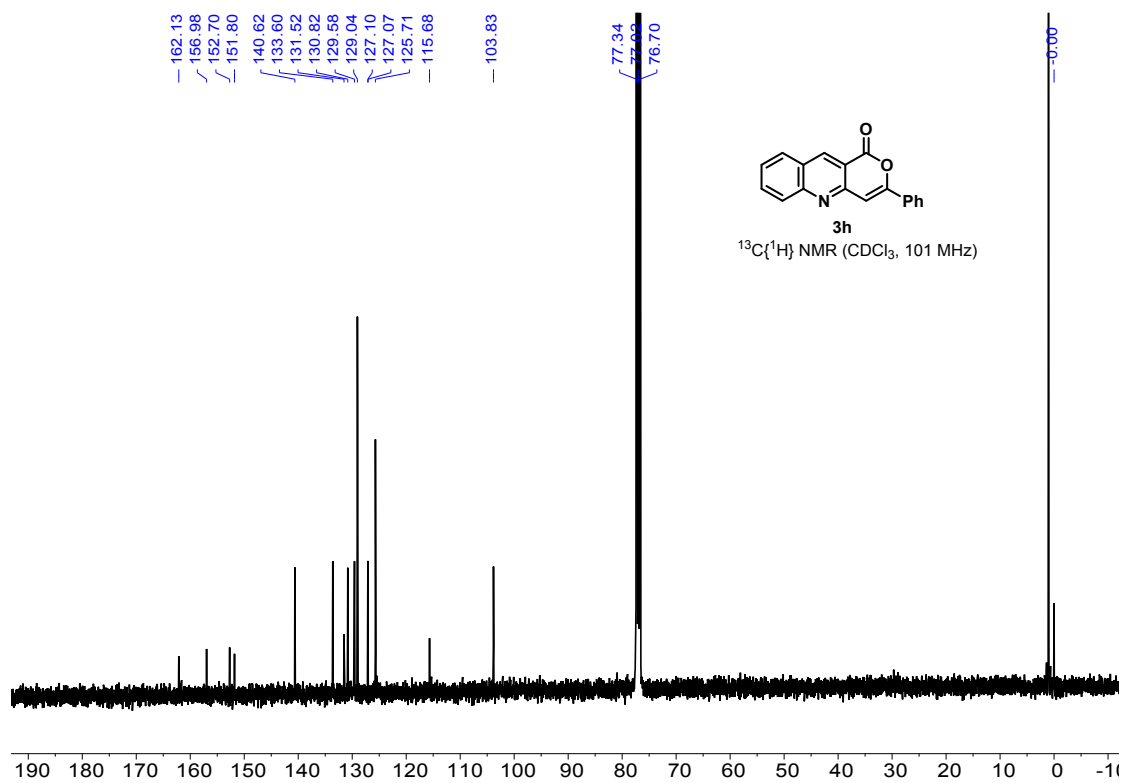

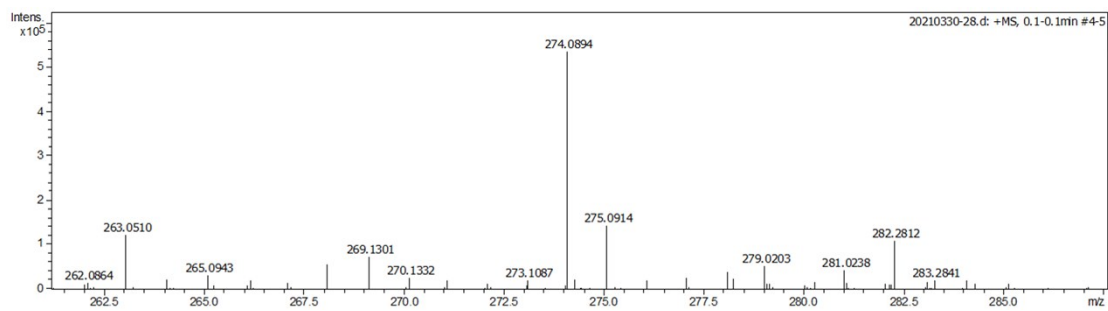

**(3h)** HRMS (ESI-TOF)  $m/z$  calcd for  $C_{18}H_{12}NO_2$   $[M + H]^+$ : 274.0863, found 274.0894.
